1 **The balance between growth and resistance is shifted to the latter by over-**  
2 **accumulation of chloroplast-nucleus located WHIRLY1 in barley**

3 Monireh Saeid Nia<sup>1</sup>, Susann Frank<sup>1</sup>, Anke Schäfer<sup>1</sup>, Christine Desel<sup>1</sup>, Maria Mulisch<sup>1</sup>, Ulrike  
4 Voigt<sup>1</sup>, Daniela Nowara<sup>2#</sup>, Yudelsy Antonia Tandron Moya<sup>2</sup>, Wolfgang Bilger<sup>1</sup>, Nicolaus von  
5 Wiren<sup>2</sup>, Götz Hensel<sup>2§</sup>, Karin Krupinska<sup>1\*</sup>

6 <sup>1</sup>*Institute of Botany, Christian-Albrechts-University (CAU, Kiel, Germany*

7 <sup>2</sup>*Leibniz Institute of Plant Genetics and Crop Plant Research (IPK), Seeland, OT*  
8 *Gatersleben, Germany*

9  
10 <sup>§</sup>*current address: Centre for Plant Genome Engineering (CPGE), Institute of Plant*  
11 *Biochemistry, Heinrich-Heine-University, Düsseldorf, Germany*

12  
13 <sup>#</sup>*current address: Institute of Plant Pathology, University of Bonn, Germany*

14  
15 <sup>\*</sup>*corresponding author: Karin Krupinska [kk@bio.uni-kiel.de](mailto:kk@bio.uni-kiel.de)*

16

17 **SUMMARY**

18 WHIRLY1 is a chloroplast-nucleus located DNA/RNA-binding protein with functions in  
19 development and stress tolerance. By overexpression of *HvWHIRLY1* in barley, lines with a  
20 10- and two lines with a 50-fold accumulation of the protein were obtained. In these lines, the  
21 relative abundance of the nuclear form exceeded that of the chloroplast form indicating that  
22 over-accumulating WHIRLY1 exceeded the amount that chloroplasts can sequester. Growth  
23 of the plants was shown to be compromised in a WHIRLY1 abundance-dependent manner.  
24 Over-accumulation of WHIRLY1 in chloroplasts had neither an evident impact on nucleoid  
25 morphology nor on the composition of the photosynthetic apparatus. Nevertheless, oeW1  
26 plants were found to be compromised in the efficiency of photosynthesis. The reduction in  
27 growth and photosynthesis was shown to be accompanied by a decrease in the levels of  
28 cytokinins and an increase in the level of jasmonic acid. Gene expression analyses revealed  
29 that already in non-stress conditions the oeW1 plants had enhanced levels of pathogen  
30 response (PR) gene expression indicating activation of constitutive defense. During growth in  
31 continuous light of high irradiance, *PR1* expression further increased in addition to an increase  
32 in the expression of *PR10* and of the gene encoding phenylalanine lyase (*PAL*), the key  
33 enzyme of salicylic acid biosynthesis in barley. The activation of defense gene expression in  
34 oeW1 plants coincided with an enhanced resistance towards powdery mildew, which in barley  
35 is independent of salicylic acid. Taken together, the results show that over-accumulation of  
36 WHIRLY1 in barley to levels of 10 or more, amplified the tradeoff between growth and stress  
37 resistance.

38

39

## 40 INTRODUCTION

41 WHIRLY proteins are multifunctional DNA/RNA binding proteins localized to the DNA-  
42 containing organelles and the nucleus of higher plants (Krupinska *et al.*, 2022). Investigations  
43 with mutants and knockdown plants have shown that WHIRLIES affect developmental  
44 processes and stress tolerance (Krupinska *et al.*, 2022).

45 Initially, the WHIRLY1 protein has been identified as a transcriptional activator of the pathogen  
46 response gene *PR10a* in potato (Desveaux *et al.*, 2000). Its binding to the promoters of PR  
47 genes that are enriched in elicitor response elements (ERE) was shown to depend on salicylic  
48 acid (SA) (Desveaux *et al.*, 2004). In recent years it has been shown that the role of SA is not  
49 limited to pathogen defense but that SA has an essential role in the regulation of redox  
50 homeostasis and thereby affects plants' responses towards abiotic and biotic stress (Mateo *et*  
51 *al.*, 2006, Karpinski *et al.*, 2013). Accordingly, the abundance of WHIRLY1 as a critical protein  
52 in SA signaling was shown to impact the plants' tolerance to diverse abiotic stress situations  
53 as well as pathogen defense. In *whirly1 (why1)* Tilling mutants of Arabidopsis, in which the  
54 binding of WHIRLY1 to the promoter of *PR1* was reduced, resistance to *Peronospora*  
55 *parasitica* was relieved, too (Desveaux *et al.*, 2004). Very recently, it has been reported that  
56 overexpression of *WHIRLY1* from *Vitis vinifera* under the control of a strong pathogen  
57 response promoter enhances resistance towards *Phytophthora capsica* (Lai *et al.*, 2022).

58 Besides its positive effect on defense, WHIRLY proteins were also found to promote tolerance  
59 towards abiotic stress. In tomato plants, overexpression of *WHIRLY1* was shown to enhance  
60 thermotolerance by upregulating the expression of the *HSP21.5A* gene which has an ERE in  
61 its promoter and encodes an endoplasmic reticulum-localized heat shock protein (Zhuang *et*  
62 *al.*, 2020a). Another study by the same research group showed that the plants overexpressing  
63 *SIWHIRLY1* had an enhanced chilling tolerance (Zhuang *et al.*, 2019). Vice versa, tomato  
64 plants with an RNAi-mediated knockdown of *SIWHIRLY1* showed reduced resistance to  
65 chilling (Zhuang *et al.*, 2019) and heat (Zhuang *et al.*, 2020a). In maize and barley, it has been  
66 demonstrated that a reduction of WHIRLY1 negatively affects chloroplast development (Prikryl  
67 *et al.*, 2008, Krupinska *et al.*, 2019). Furthermore, barley plants deficient in WHIRLY1 were  
68 shown to be compromised in light acclimation (Saeid Nia *et al.*, 2022).

69 Intriguingly, WHIRLY1 in barley was shown to locate in both, chloroplasts and nucleus of the  
70 same cell (Grabowski *et al.*, 2008). In transplastomic tobacco plants synthesizing a tagged  
71 WHIRLY1 protein, this tagged protein was found in the nucleus indicating a translocation of  
72 WHIRLY1 from chloroplasts to the nucleus. In these plants, the expression of PR genes was  
73 enhanced (Isemer *et al.*, 2012b). It has been hypothesized that storage of a transferable  
74 resistance protein such as WHIRLY1 in plastids might allow the plants to react immediately to  
75 pathogen attack avoiding the time and costs of gene expression (Krause and Krupinska, 2009).  
76 The translocation was suggested to occur in response to stress-associated redox changes in  
77 the photosynthetic apparatus (Foyer *et al.*, 2014). WHIRLY1 is a positive regulator of both plant  
78 development and stress tolerance. Hence, WHIRLY1 promotes two traits that usually are  
79 inversely correlated. Indeed, enhanced stress tolerance coincides with lower growth and  
80 productivity (Herms and Mattson, 1992). This tradeoff is thought to be caused by resource  
81 restrictions demanding a prioritization of either growth or defense in response to environmental  
82 factors (Huot *et al.*, 2014). The tradeoff is seemingly inevitable because the energy required  
83 for resistance is no longer available for biomass accumulation and production of seeds

84 (Karasov *et al.*, 2017). Thousands of genes are typically activated to fight a pathogen or cope  
85 with another stressful situation. Among others, the tradeoff between growth and defense is  
86 regulated by crosstalk between defense and growth hormones (Huot *et al.*, 2014). Regulation  
87 of the level of free auxin is a significant determinant of adaptive growth in response to biotic  
88 and abiotic stress (Park *et al.*, 2007). Recently, it has been demonstrated that MAP kinases  
89 activated during the immune response are involved in the downregulation of the expression of  
90 photosynthesis-associated genes, thereby exerting a negative impact on growth (Su *et al.*,  
91 2018).

92 Several studies with different dicot species have clearly shown a positive impact of over-  
93 accumulating WHIRLY1 on stress tolerance, however, without reporting effects on  
94 development and growth in these plants. Regarding the multifunctionality of WHIRLIES  
95 (Krupinska *et al.*, 2022a) it is expected that other physiological parameters are altered besides  
96 stress tolerance. This study aimed to investigate the impact of a much higher abundance of  
97 multifunctional WHIRLY1 on plant growth and stress tolerance.

## 98 RESULTS

### 99 Overexpression of *HvWHIRLY1* altered the abundance of *HvWHIRLY1* in chloroplasts 100 and the nucleus

101 By transforming barley with *HvWHIRLY1* under the control of the constitutive *UBIQUITIN 1*  
102 promoter of maize (Figure 1a), three homozygous lines were selected and used for  
103 characterization. Immunoblot analysis with the *HvWHIRLY1* specific antibody (Grabowski *et al.*,  
104 2008) revealed that in primary foliage leaves of line oeW1-14, the level of *HvWHIRLY1*  
105 was enhanced by a factor of about 50 (Figure 1b) as it was also in line oeW1-2 (Figure S1a).  
106 For comparison, in line oeW1-15 the level of WHIRLY1 was enhanced by a factor of 10 (Figure  
107 1b).

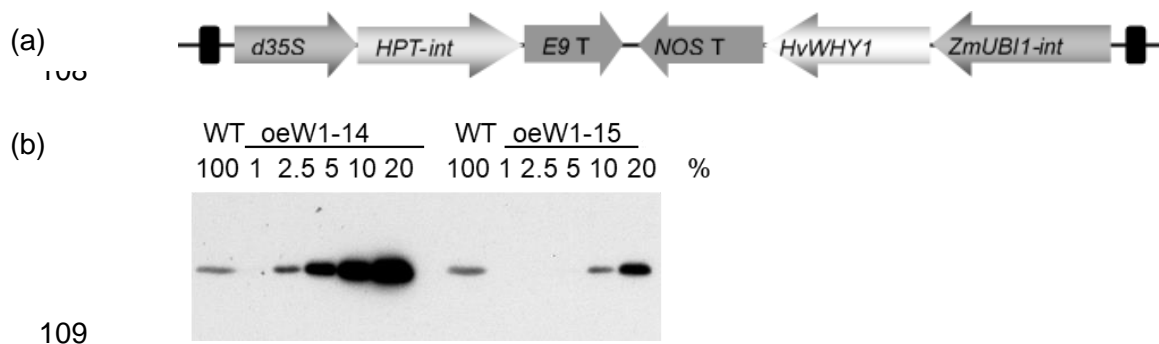

110 **Figure 1.** Overexpression of *HvWHIRLY1* in barley. (a) Schematic drawing of the T-DNA used for  
111 overexpression of *HvWHIRLY1* under control of the *UBIQUITIN 1* promoter of maize. (b) Accumulation  
112 of the WHIRLY1 protein in total protein extracts derived from primary foliage leaves of the two transgenic  
113 lines, oeWHIRLY1-14 and oeWHIRLY1-15. For comparison, different amounts of leaf protein were used  
114 and indicated as a percentage of protein from wild-type plants (WT). d35S – doubled enhanced *CaMV*  
115 35S promoter, HPT-int – *Hygromycin phosphotransferase* gene with *StLS1* intron, E9 T – Terminator of  
116 *Rbcs-E9* gene, ZmUBI1-int – maize *UBIQUITIN 1* promoter with the first intron, *HvWHY1* – barley  
117 *WHIRLY1*, NOS T – *Agrobacterium tumefaciens Nopaline synthase* gene termination signal.

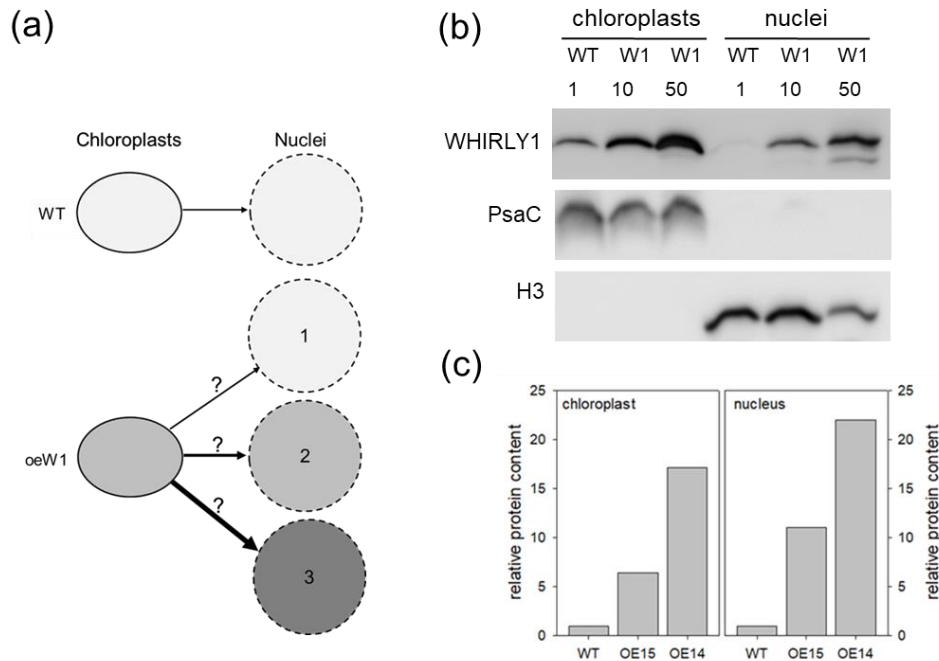

118

119

120

121

122

123

124

125

126

127

128

129

130

131

132

133

134

135

136

137

138

139

140

141

142

143

144

145

146

147

148

149

150

151

152

**Figure 2.** Relative WHIRLY1 levels in extracts from chloroplasts and nuclei, respectively.

(a) Putative consequences of *WHIRLY1* overexpression (oeW1) for the distribution of the WHIRLY1 protein between chloroplasts and the nucleus. Different levels of WHIRLY1 are illustrated by light, medium, or dark grey symbols that represent chloroplasts or nuclei. The distribution in chloroplasts and nuclei of the wild type (WT) is normalized (light grey area). Either the transfer of WHIRLY1 to the nucleus will be not altered in comparison to the wild type (1), or the transfer will be enhanced resulting in a similar relative over-accumulation of WHIRLY1 in chloroplasts and the nucleus (2) or the transfer will be relatively higher as expected resulting in a higher relative abundance of WHIRLY1 in the nucleus compared to chloroplasts (3).

(b) Subcellular fractions were prepared from primary foliage leaves of WT, oeW1-15 (10-fold accumulation of WHIRLY1), and oeW1-14 (50-fold accumulation of WHIRLY1) plants. Immunoblot analysis was performed with extracts from chloroplasts (CP) and nuclei (N). Each lane was loaded with 6  $\mu$ g of protein. To show the purity of fractions, antibodies directed towards PsaC and histone 3 (H3) have been used.

(c) Relative abundances of the WHIRLY1 protein were calculated from the signal intensities measured by the ChemiDoc MP Imaging Systems after different times of exposure using the Image Lab 6.1 software. The relative intensities of the WHIRLY1 signals detected in chloroplast and nuclei samples, respectively, are based on the signal intensities of WT samples.

WHIRLY1 is dually located in chloroplasts and nucleus. To investigate whether the over-accumulation of the protein occurred in both compartments and whether the relative distribution between chloroplasts and nucleus is altered by the overexpression of *WHIRLY1* leaves (Fig. 2a) WHIRLY1 abundance was immunologically investigated in chloroplast and nuclei fractions prepared from primary foliage leaves of the oeW1-15 and the oeW1-14 lines. Theoretically, excess WHIRLY1 could accumulate only in chloroplasts or could also accumulate in nuclei, whereby the ratio between chloroplast and nuclear WHIRLY1 could be similar to in WT plants or could be shifted towards the nuclear form (Figure 2a). Immunoblots with the specific antibody for HvWHIRLY1 showed that the abundance of HvWHIRLY1 was enhanced in both chloroplasts and nuclei (Figure 2b, Figure S1b). Thereby the relative increase in quantity in both lines was higher in nuclei than in chloroplasts (Fig. 2c). Considering that the proteins in chloroplasts and nucleus have the same molecular weight, the higher abundance in the nucleus likely results from an enhanced flux of protein from chloroplasts to

153 the nucleus. This result suggests that the capacity to sequester HvWHIRLY1 in chloroplasts is  
154 saturated, and relatively more WHIRLY1 is transferred to the nucleus (Figure 2).

### 155 **Growth of barley oeW1 plants**

156 To investigate whether WHIRLY1 overaccumulation has consequences for growth, the lengths  
157 of primary foliage leaves were measured every day until they were fully expanded (Figure 3).  
158 An apparent growth reduction correlated with an abundance of WHIRLY1. Growth curves  
159 showed that the seedlings of oeW1-10 were longer than those of the oeW1-50 line (Figure 3).  
160 The growth kinetics did not differ between WT and oeW1 seedlings. The maximal expansion  
161 of the primary foliage leaves was terminated at the same time after sowing, i.e. at 9 days (Fig.  
162 2a).

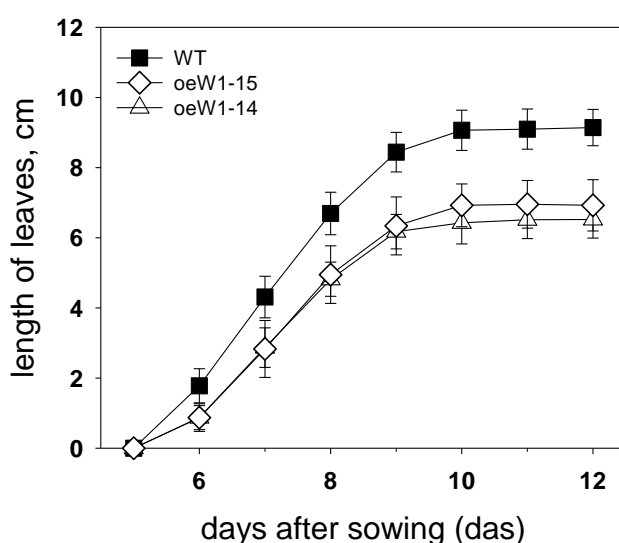

163  
164 **Figure 3.** The lengths of entire primary foliage leaves of WT, oeW15, and oeW14 were determined by  
165 measuring the lengths from the kernel, where the leaf sheath starts, to the leaf tip at 5-12 days after  
166 sowing. Symbols represent means  $\pm$  SD of n=13-20 leaves.

### 167 **Characterization of the photosynthetic apparatus**

168 To investigate whether changes in the photosynthetic apparatus are responsible for the  
169 reduced growth of the oeW1 seedlings, the functionalities of the two photosystems were  
170 examined during the development of barley seedlings in a daily light/dark regime. Chlorophyll  
171 fluorescence measurements revealed that the maximal quantum yield of photosystem II,  $F_V/F_M$ ,  
172 which is a measure of photosystem II efficiency, in WT seedlings was already relatively high  
173 at 7 das (0.7) and increased to nearly 0.8 at 10 das. In comparison,  $F_V/F_M$  of the oeW1-50  
174 leaves stayed rather low, reaching a maximal value of about 0.5 at 10 das (Figure 4a).

175 For comparison, in oeW1-10 seedlings,  $F_V/F_M$  had a value of 0.6 at 7 das and a value of 0.7 at  
176 9 and 10 das (Fig. 4a). In contrast to  $F_V/F_M$ , which barely changed in wild-type leaves during  
177 the growth period investigated, the capacity of photosystem I measured by the maximal  
178 absorbance change of  $P_{700}$  ( $P_M$ ) increased from 0.3 at 7 das until 0.7 at 10 das (Figure 4a).

179 The values stayed significantly lower in both oeW1 lines, whereby oeW1-14 seedlings had  
 180 lower values than oeW1-15 seedlings (Fig. 4a).

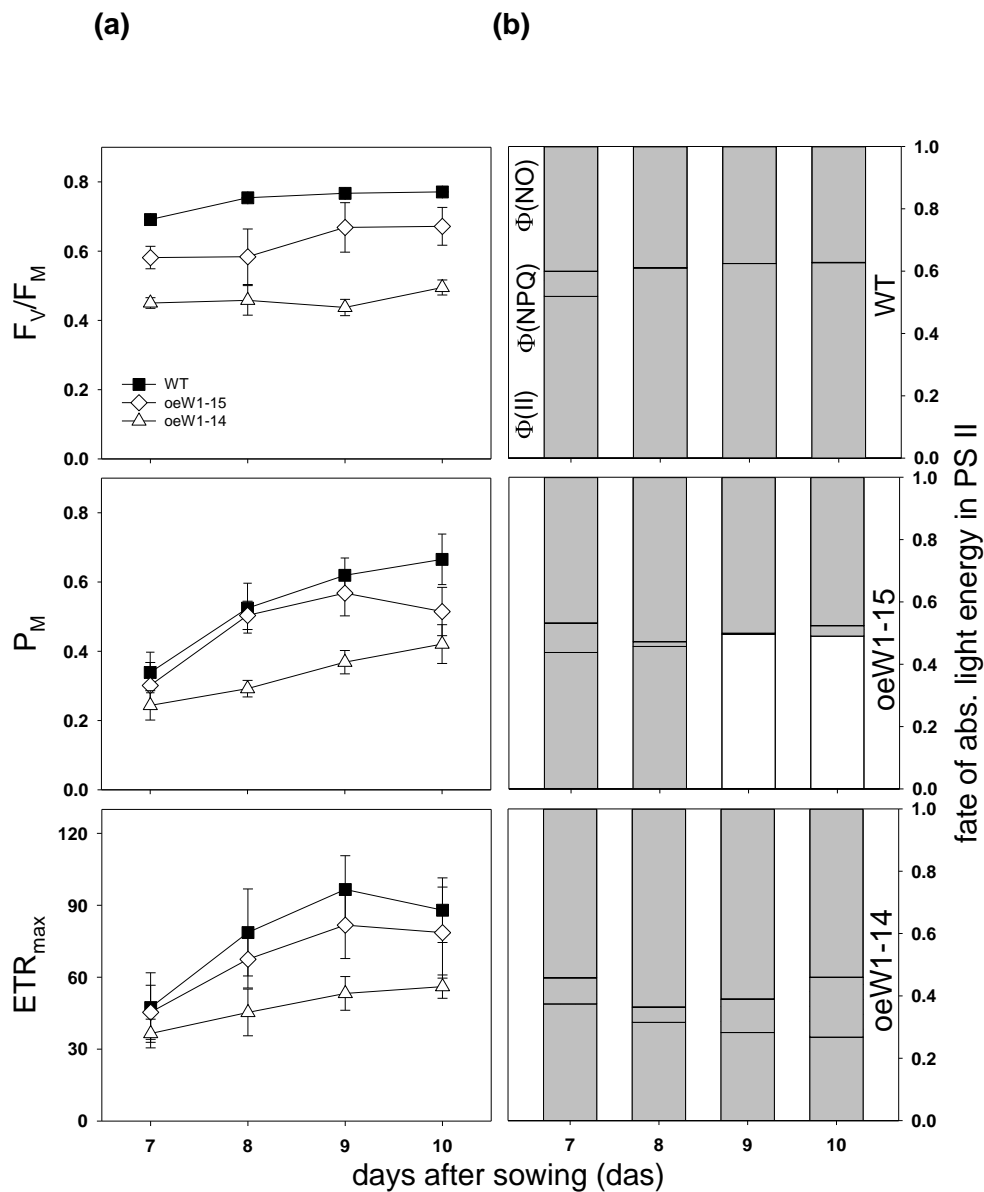

181  
 182 **Figure 4.** Characterizing the photosynthetic apparatus in primary foliage leaves of WT, oeW1-14, and  
 183 oeW1-15 seedlings grown under a daily light-dark cycle (L/D). (a) The optimal quantum yield of  
 184 photosystem II,  $F_v/F_M$ , the maximum P700 signal ( $P_M$ ), and the maximal electron transport rate ( $ETR_{max}$ )  
 185 were measured at room temperature at different days after sowing (7-10 das). Depicted values are mean  
 186  $\pm$  SD of  $n=6$  leaves. (b) Fate of the light energy absorbed at PS II was determined at an irradiance of 60  
 187  $\mu\text{mol m}^{-2} \text{s}^{-1}$ . The quantum yield of photochemistry ( $\Phi(II)$ ), of regulated non-photochemical quenching  
 188 ( $\Phi(NPQ)$ ) and non-regulated non-photochemical quenching ( $\Phi(NO)$ ) were calculated according to the  
 189 formulas given in Materials and Methods. Columns are means  $\pm$  SD of  $n=6$  leaves.

190 In addition to the efficiency of photosystem II, the maximum electron transport rate of  
 191 photosystem II ( $ETR_{max}$ ) was reduced in the primary foliage leaves of oeW1 seedlings  
 192 measured on different days after sowing (7-10 das). The results showed that oeW1-14 leaves  
 193 had only about 50% of the electron transport capacity of WT leaves, while oeW1-15 leaves  
 194 had about 80% of the WT level (Figure 4a). Whereas the transport rate in WT and oeW1-15  
 195 leaves was maximal already at 9 das, it still increased in oeW1-14 leaves from 9 das until 10



196 das. An analysis of the partitioning of absorbed energy in photosystem II revealed that the  
197 quantum yield of photosystem II ( $\Phi(\text{II})$ ) was lower in *oeW1* plants at all stages of development  
198 compared to WT plants. The remaining fraction was dissipated mainly as heat or fluorescence  
199 ( $\Phi(\text{NO})$ ). Only a small fraction was used for non radiative dissipation in the *oeW1* leaves  
200 (Figure 4b).

201 To investigate putative differences in the composition of the photosynthetic apparatus, the  
202 concentrations of pigments and the relative abundances of photosynthesis-associated proteins  
203 were analyzed. Pigment analyses by HPLC showed that the chlorophyll content per leaf area  
204 of primary foliage leaves from seedlings of the *oeW1-50* leaves was lower than the chlorophyll  
205 contents of line *oeW1-15* and the wild-type, which were similar (Figure 5). The ratio of  
206 chlorophyll a/b was reduced in both *oeW1* lines (Figure 5) and was independent of the leaves  
207 developmental stage.

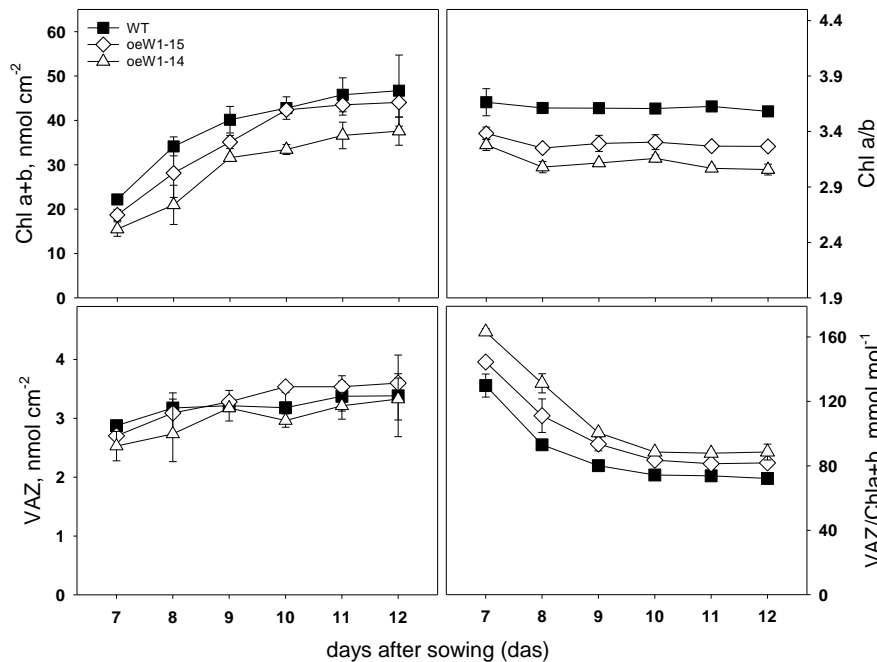

208

209 **Figure 5.** Pigment content of primary foliage leaves of barley wild type, *oeW1-14* and *oeW1-15* lines.  
210 Leaves were collected in the growth period from day 7 until day 12 after sowing. Depicted values are  
211 means $\pm$ SD of n=3 leaves.

212

213 The content of xanthophyll cycle pigments was similar in all genotypes. However, the  
214 xanthophyll pool/chlorophyll ratio was higher in the leaves of the *oeW1* lines, in particular in  
215 the *oeW1-50* leaves.

216 Protein extracts from primary foliage leaves of WT and *oeW1* seedlings were immunologically  
217 analyzed for the levels of central photosystem I (PsaA), photosystem II (D1/PsbA) proteins,  
218 and two light-harvesting proteins, i.e. LHCA1 and LHCB1, respectively. As already reported,  
219 the abundance of WHIRLY1 in the WT declined with the increasing age of the leaves  
220 (Kucharewicz *et al.*, 2017, Krupinska *et al.*, 2019). The levels of all tested proteins were similar  
221 in the WT and the *oeW1* lines. (Figure 6). The staining also indicates that the two subunits of  
222 RubisCO had the same abundance as in the WT and that the levels are stable during  
223 development from 7 das until 12 das.

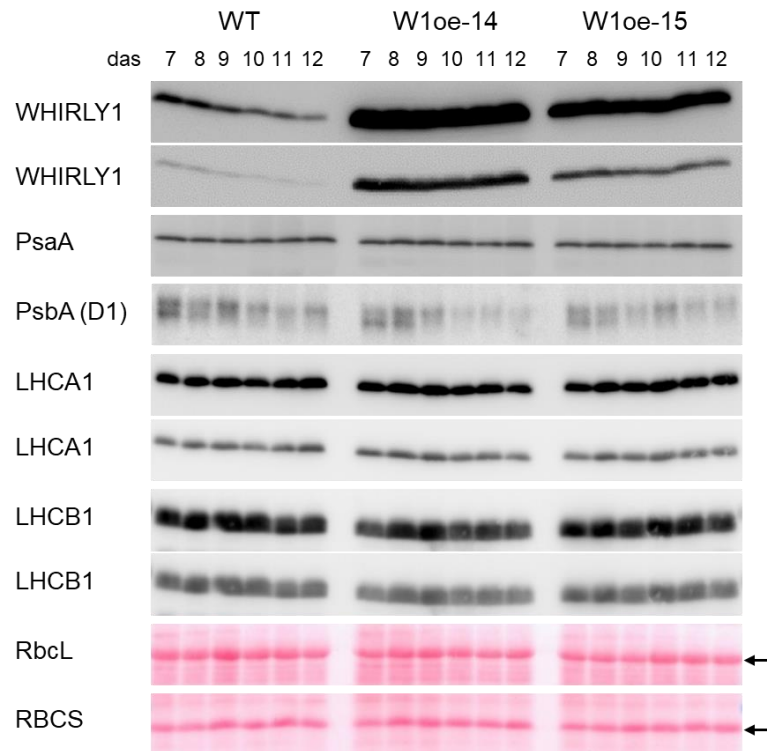

224

225 **Figure 6.** Relative amounts of proteins of the photosynthetic apparatus in primary foliage leaves of the  
226 WT, the oeW1-14 line, and the oeW1-15 line. Protein extracts were prepared from the leaves at different  
227 times after sowing (7-12 das). Immunological analyses were performed with specific antibodies directed  
228 towards WHIRLY1 and selected proteins of the photosynthetic apparatus: PsaA, PsbA (D1), LHCA1,  
229 and LHCB1. In the case of WHIRLY1, LHCA1 and LHCB1, two different exposures are shown,  
230 respectively. At the bottom, Ponceau stained gel parts showing the large and the small subunits of  
231 RubisCO (indicated by arrows) are presented.

232

233 In order to investigate gene expression in chloroplasts from oeW1 leaves in comparison to WT  
234 leaves, mRNA levels of genes encoding central components of the photosynthetic apparatus  
235 were analyzed by RT-PCR (Figure S2). While mRNA levels of all genes declined during the  
236 development of WT leaves, the mRNAs stayed at relatively high levels during the development  
237 of the oeW1 leaves. While in RNAi-W1 plants, plastid gene expression was mainly due to the  
238 activity of the nuclear-encoded RNA polymerase (NEP) (Krupinska *et al.*, 2019), in the oeW1  
239 lines transcripts of both NEP (*rpoB*, *clpP*) and PEP (*psbE*) were present at higher levels than  
240 in WT plants. This result indicates that overexpression of *WHIRLY1* did not hamper  
241 transcription in chloroplasts.

## 242 Chloroplast ultrastructure and nucleoid morphology

243 When primary foliage leaves of barley were fully expanded (10 das), ultrathin sections from  
244 WT and oeW1-14 seedlings grown in a daily light/dark cycle were fixed for ultrastructural  
245 analyses by transmission electron microscopy. While mitochondria and peroxisomes looked  
246 rather similar in WT and oeW1 samples (Figure 7a), chloroplasts showed noticeable  
247 morphological differences (Figure 7b). Chloroplasts of oeW1 plants apparently contained more  
248 plastoglobules (Figure 7). Plastoglobules are lipoprotein particles surrounded by a lipid  
249 monolayer, which is contiguous with the outer leaflet of thylakoid membranes. They contain  
250 mainly isoprenoid-derived lipophilic compounds and function in remodeling the lipid phase of



251 thylakoids (van Wijk and Kessler, 2017). An increase in the number and/or size of  
252 plastoglobules was reported to indicate excess light in the photosynthetic apparatus (Brehelin  
253 *et al.*, 2007, Rottet *et al.*, 2016) and was observed during various stressful situations  
254 (Lichtenthaler, 2013, van Wijk and Kessler, 2017). Thylakoids in the chloroplasts of oeW1  
255 leaves showed a tendency to swell. Following the lower photosynthetic activity of oeW1 leaves  
256 (Figure 3), chloroplasts of the oeW1 plants did not contain starch grains which were frequently  
257 observed in the wild-type chloroplasts.

258 Considering that WHIRLY1 is a major nucleoid-associated protein (Pfalz *et al.*, 2006,  
259 Krupinska *et al.*, 2022b), special attention was committed to the structure of nucleoids in  
260 mature chloroplasts of the primary foliage leaves of WT and oeW1 seedlings. Ultrastructural  
261 analyses did, however, not reveal apparent differences between nucleoids in WT and oeW1  
262 sections (Fig. 6c-d). In addition, nucleoids of mature chloroplasts were also visualized by light  
263 microscopy after staining sections with SYBR Green (Figure 7e). By this procedure, neither  
264 differences in size nor the distribution of nucleoids were observed between the two genotypes.

265 Previous studies revealed a profound impact of WHIRLY1 on the packaging of plastid DNA  
266 (Krupinska *et al.*, 2014) and bacterial nucleoids (Oetke *et al.*, 2022). Considering that  
267 WHIRLY1 also plays a significant role in chloroplast development (Prikryl *et al.*, 2008,  
268 Krupinska *et al.*, 2019, Krupinska *et al.*, 2022), it might be possible that putative differences in  
269 nucleoid morphology depend on the developmental stage of plastids. Using the developmental  
270 gradient of the leaves of small-grained cereals (Boffey *et al.*, 1980), putative development-  
271 related changes in nucleoid morphology were investigated by staining sections prepared from  
272 the base and the middle part of the leaves of WT, oeW1-2 having a 50-fold over-accumulation  
273 as in oeW1-14 plants, and oeW1-15 seedlings with a 10-fold over-accumulation of WHIRLY1,  
274 respectively. Although WHIRLY1 abundances in chloroplasts are dramatically different  
275 between WT and an oeW1-50 line, no apparent differences in nucleoid morphology were  
276 observed. In all genotypes, nucleoids in undifferentiated plastids at the base are arranged like  
277 pearls on a string. In contrast, nucleoids in mature chloroplasts are dispersed inside the  
278 chloroplasts (Figure S3) due to their attachment to thylakoid membranes (Powikrowska *et al.*,  
279 2014).

## 280 **Hormone levels and defense-related gene expression**

281 To elucidate whether the reduced growth of the oeW1 plants was related to changes in the  
282 levels of growth hormones, cytokinins and auxins were determined at 7 and 10 das in primary  
283 foliage leaves of plants grown at a light intensity of 100  $\mu\text{mol m}^{-2} \text{s}^{-1}$ . These measurements  
284 revealed that independent of the developmental stage, the levels of the cytokinin N<sup>6</sup>-  
285 isopentenyl adenosine (iPR) were reduced by about 30% or 60% in the primary foliage leaves  
286 of oeW1-15 or oeW1-14 plants, respectively (Figure 8). For comparison, indole-3-acetic acid  
287 (IAA) levels were similar among the lines. At 10 das a reduction in the level of IAA by about  
288 20% was measured in the leaves of the oeW1-14 line (Figure 8).

289

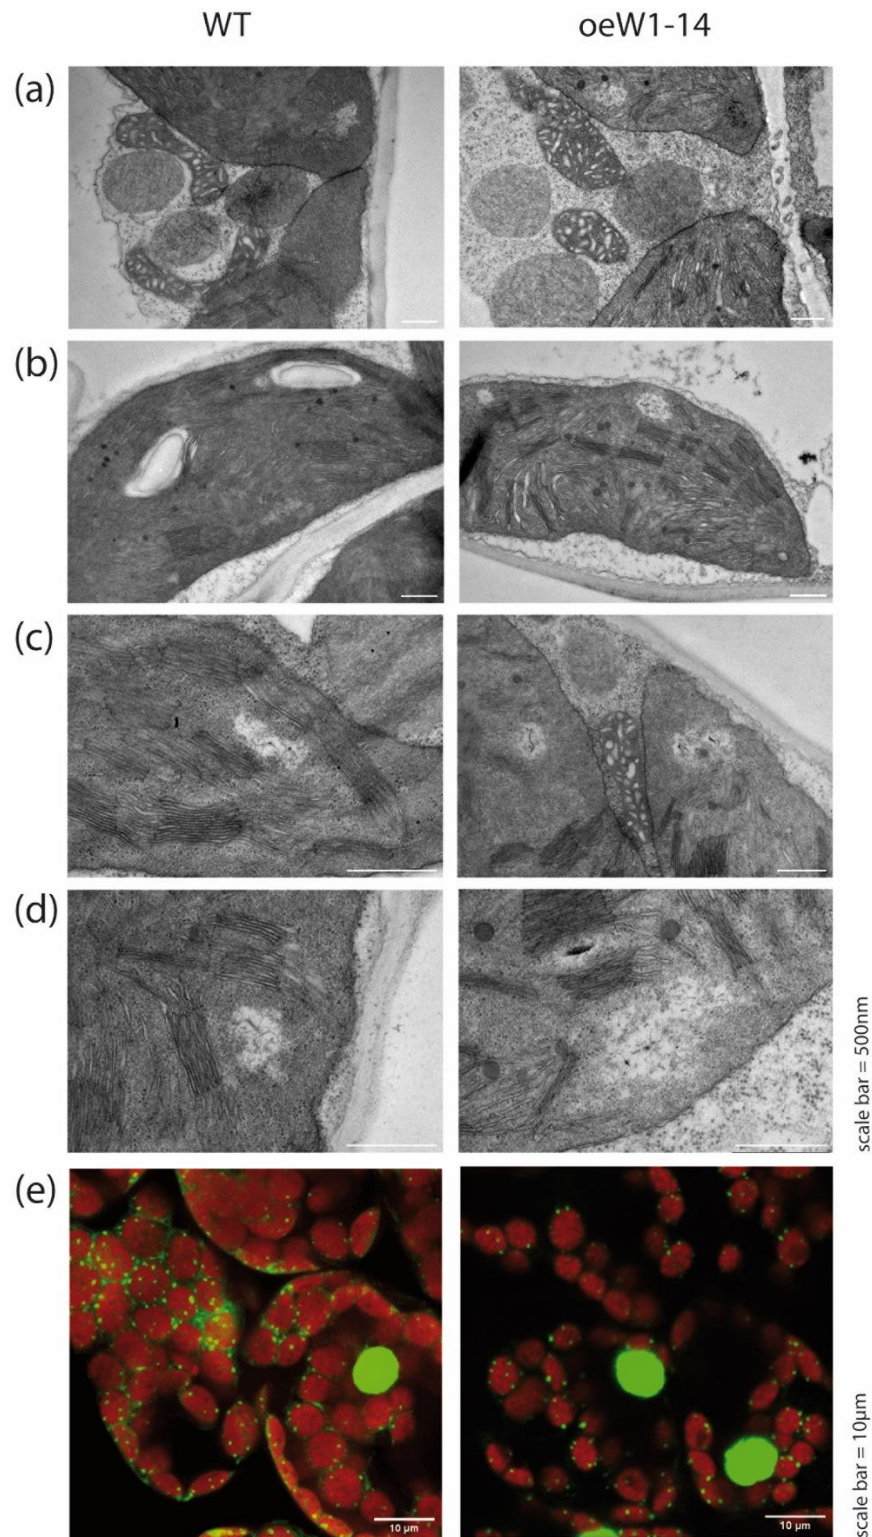

290

291 **Figure 7.** Microscopic analyses of chloroplasts and nucleoids from WT and oeW1-14 seedlings by  
292 transmission electron microscopy (a-d) and confocal fluorescence microscopy (e) where the green  
293 fluorescence was emitted by DNA stained with SYBR Green. Samples were excited by an argon laser  
294 at 488 nm (5% power). Emission was detected between 510-570 nm (HV750) and 690-760 nm  
295 (HV480).

296

297 For comparison, the levels of hormones involved in defense were determined. While free  
298 salicylic acid was too low to be determined, its catabolite and storage compound were  
299 detectable. It has been shown that in barley during pathogen defense, SA is not produced via  
300 the isochorismate (ICS) pathway (Vlot *et al.*, 2009, Rekhter *et al.*, 2019), but rather by the  
301 phenylpropanoid pathway controlled by phenylalanine lyase (PAL) (Qin *et al.*, 2019). The  
302 levels of 3,4-dihydroxy benzoic acid were about twofold higher in young leaves of the oeW1-  
303 14 leaves compared to the other lines, but this difference disappeared when leaves were  
304 collected at 10 das (Figure S6). Levels of SA glucosides which is a storage form of SA (Vlot *et al.*,  
305 2009), showed a tendency to be higher in the leaves from oeW1-14 plants, in particular in  
306 young leaves (7 das) (Figure S6). The determination of jasmonic acid (JA) revealed that at 8  
307 das overexpression of *HvWHIRLY1* significantly increased its level by a factor of 3 or 5 in  
308 oeW1-15 or oeW1-14 lines, respectively. Thereby the basis level measured in the WT leaves  
309 was slightly enhanced at 10 das, compared to 8 das (Figure 8). Taken together, the results  
310 revealed that over-accumulation of WHIRLY1 induced reciprocal changes in the levels of iPR  
311 and JA which might cause a shift from growth to defense.

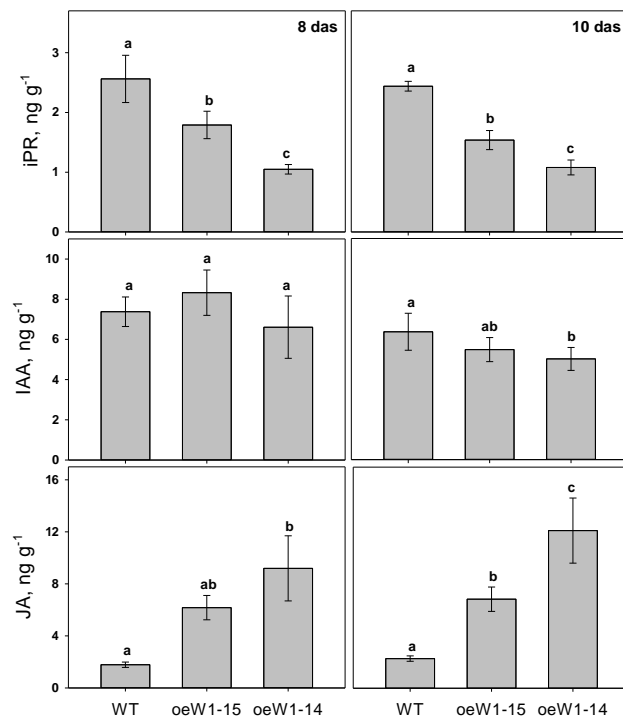

312

313 **Figure 8.** Hormone levels in primary foliage leaves of the WT in comparison to the oeW1-15 and oeW1-  
314 14 lines: N<sup>6</sup>-isophentenyladenosine (iPR), indole acetic acid (IAA) and jasmonic acid (JA). Leaves were  
315 collected at 8 das and at 10 das, respectively. Columns are means  $\pm$  SD of n=5 leaves.

316 To investigate whether according changes in gene expression accompanied the transition from  
317 development to defense, mRNA levels of key enzymes in the biosynthesis of defense  
318 hormones were determined besides the levels of *WHIRLY1* mRNA and *PR1* mRNA by  
319 quantitative real-time PCR. The result showed that *HvWHIRLY1* had an up to 20-fold higher  
320 mRNA level in primary foliage leaves of oeW1-14 seedlings compared to the WT. *PR1* is  
321 known as a marker of SAR (Linthorst, 1991). While in Arabidopsis and other dicots, it was  
322 reported to be a target gene of salicylic acid (Van Loon and Van Strien, 1999, Golshani *et al.*,  
323 2015), *PR1* in rice was shown to accumulate in response to JA (Rakwal and Komatsu, 2000,  
324 Jwa *et al.*, 2006). In this study, barley *PR1* expression was upregulated in WT and oeW1  
325 seedlings when the leaves became fully expanded. While in the WT, *PR1* expression was

326 upregulated by a factor of 6 at 10 das and by a factor of 11 at 12 das, in oeW1 seedlings,  
327 expression of the gene was highly upregulated by a factor of 120 at 10 das (Figure 9).  
328 Upregulation of *PR1* in the oeW1 seedlings was neither accompanied by upregulation of the  
329 gene encoding PAL nor ICS, which are the key enzymes of the two pathways of salicylic acid  
330 biosynthesis (Vlot *et al.*, 2009) (Figure 9).

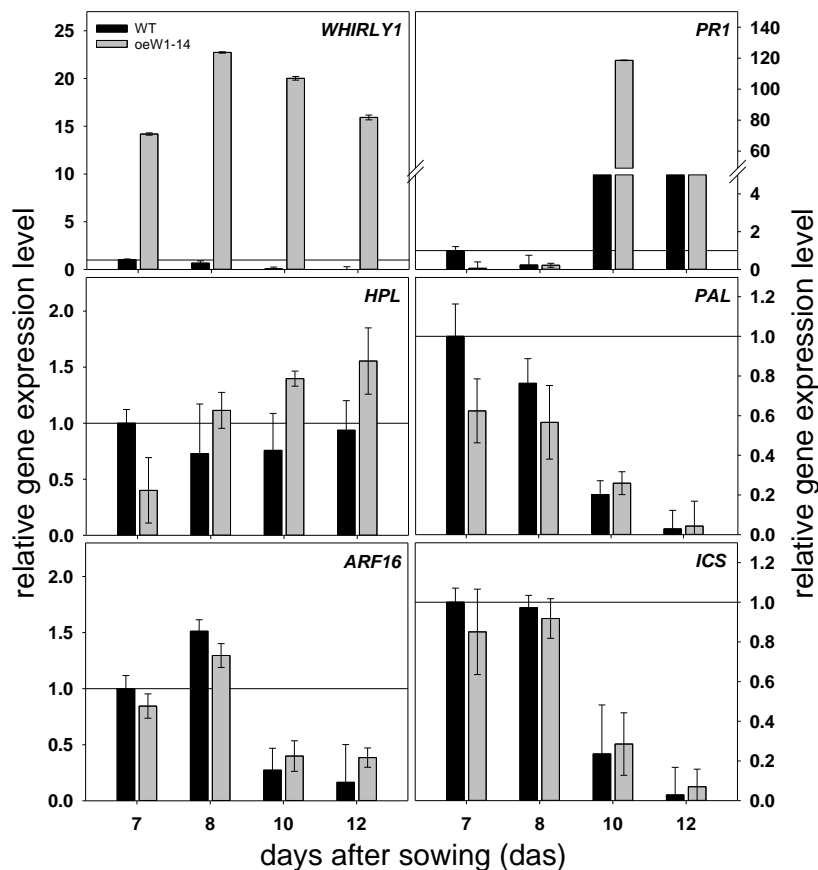

331  
332  
333  
334  
335  
336  
337  
338

**Figure 9.** Expression of *HvWHIRLY1* and selected stress-associated genes measured by qRT-PCR using *GAPDH* (see Material and Methods) as standard. RNA was extracted from primary foliage leaves of WT and oeW1-14 seedlings grown for different times (7, 8, 10 and 12 das) in a daily light/dark cycle. RNA levels were compared to those of the wild type at 7 das that were set to 1 and represented by horizontal lines. Columns are means  $\pm$  SD of  $n=3$  samples (each sample comprised 10 pooled leaves).

339 Expression of the general stress associated *HPL* gene encoding hydroperoxide lyase, a  
340 chloroplast protein of the oxylipin pathway shown to protect against photoinhibition (Savchenko  
341 *et al.*, 2017), was only upregulated by about 50% in fully expanded primary foliage leaves of  
342 the oeW1 seedlings. This gene was chosen because it is known to be a stress indicator gene  
343 regulated by retrograde signaling during stress in *Arabidopsis* (Xiao *et al.*, 2012, Xiao *et al.*,  
344 2013). Its expression barely changed in WT seedlings during normal growth (Figure 9). In  
345 contrast to *PR1*, the expression of *THIO1*, another barley defense gene (Leybourne *et al.*,  
346 2022), was downregulated during growth in both WT and oeW1 seedlings (Figure S4).

347



## 348 Response of oeW1 plants to high light

349 In *Arabidopsis*, defense signaling is also activated in response to high light (Mateo *et al.*, 2006,  
350 Karpinski *et al.*, 2013). To induce high light stress, oeW1-14 and WT seedlings were grown in  
351 continuous light of 350  $\mu\text{mol m}^{-2} \text{s}^{-1}$  (HL) and were compared to seedlings grown at only 100  
352  $\mu\text{mol m}^{-2} \text{s}^{-1}$  (LL) as described previously (Swida-Barteczka *et al.*, 2018). Growth at high light  
353 leads to a decrease in the chlorophyll content of both WT and oeW1 plants. The reduction in  
354 chlorophyll content of oeW1 plants was significantly more pronounced than the WT (Figure  
355 10a) but was not as prominent as in the case of the *WHIRLY1* knockdown plants prepared by  
356 RNAi (Swida-Barteczka *et al.*, 2018). In WT seedlings,  $F_v/F_m$  was not affected by higher  
357 irradiance during growth, while it even slightly increased in the case of oeW1-14 seedlings  
358 (Figure 10a).

359 When WT seedlings were grown at HL, *PR1*, and *PR10* expression levels were elevated  
360 compared to the levels determined in LL-grown plants. This result follows the idea that SA is  
361 involved in response to HL. Overexpression of *WHIRLY1* led to a dramatic increase in the  
362 expression of both PR genes (Figure 10b). Moreover, over-accumulation of HvWHIRLY1 led  
363 to enhanced expression of *PAL*, which was more pronounced at HL than at LL (4-fold in  
364 comparison to LL) (Figure 10b). Expression of *PAL* but not of *ICS* was also slightly enhanced  
365 in the WT at HL. In comparison, *ICS* expression was enhanced in oeW1 plants only at LL, but  
366 not at HL. The high expression of *ICS* at LL could be related to an increased demand for  
367 phylloquinone (Qin *et al.*, 2019).

368 In addition, the expression of genes encoding two key enzymes of the two branches of the  
369 oxylipin biosynthesis in chloroplasts (Savchenko *et al.*, 2017) was determined, i.e. HPL leading  
370 to the biosynthesis of aldehydes and allene oxide synthase (AOS), a key enzyme of JA  
371 biosynthesis (Delker *et al.*, 2006). In the WT, *HPL* was upregulated by 4-fold, while AOS was  
372 upregulated by a factor of 5.5 (Figure 10b). In oeW1 seedlings, expression of *HPL* was already  
373 enhanced at LL and was only upregulated by 40% in HL compared to LL. Indeed, the  
374 expression levels at HL were identical between WT and oeW1 plants. The expression of AOS  
375 is upregulated likewise in HL in both the WT and the oeW1 plants.

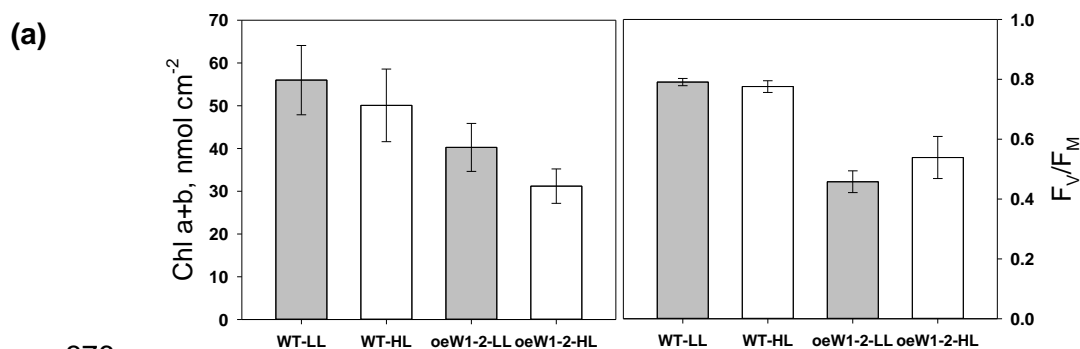

376

377



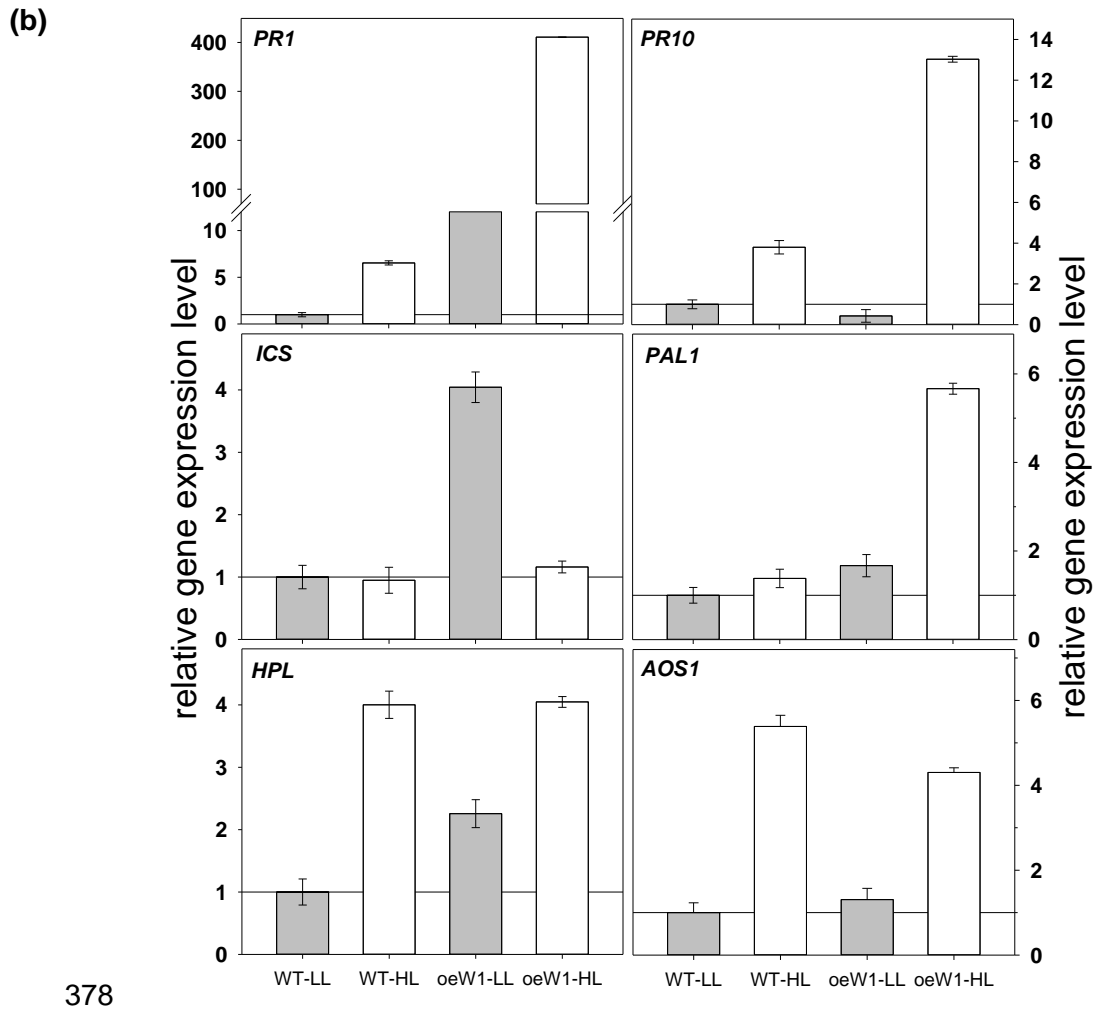

378

379 **Figure 10.** Characterization of primary foliage leaves of WT and oeW1-2 seedlings during growth in  
 380 continuous light of different irradiance (low light=LL in grey and high light =HL in open columns). (a)  
 381 Chlorophyll content and  $F_v/F_m$ . (b) expression of defense-related genes putatively associated with HL  
 382 stress and SA: *PR1*, *PR10*, *ICS*, *PAL*, *HPL*, *PAL1*, *AOS*. mRNA levels were measured by qRT-PCR  
 383 using *GAPDH* as standard gene. The levels were compared to those of the wild type grown at LL that  
 384 were set to 1 and represented by horizontal lines.

385

### 386 Response of oeW1 plants to powdery mildew

387 To investigate the impact of WHIRLY1 accumulation on pathogen resistance, leaves were  
 388 inoculated with spores of the powdery mildew fungus *Blumeria graminis*, an important barley

389 pathogen. The susceptibility to powdery mildew was compared among WT, oeW1-14, oeW1-  
 390 2 (two lines over-accumulating WHIRLY1 by a factor of 50), and two barley plants with an  
 391 RNAi-mediated knockdown of *HvWHIRLY1*, W1-1 and W1-7 (with 10% and 1% of the protein  
 392 in WT, respectively), which had been used in several investigations before (Krupinska *et al.*,  
 393 2014b, Krupinska *et al.*, 2019). Both oeW1-14, oeW1-2 were less susceptible to powdery  
 394 mildew than the WT, as determined by estimating the percentage of the leaf surface infected  
 395 by the fungus (Figure 11). Inversely, the leaves of the *WHIRLY* knockdown plants (W1-1 and  
 396 W1-7) were more susceptible to inoculation with powdery mildew spores. The results show  
 397 that a high abundance of WHIRLY positively affects the resistance towards powdery mildew.

398

399

400

401

402

403

404

405

406

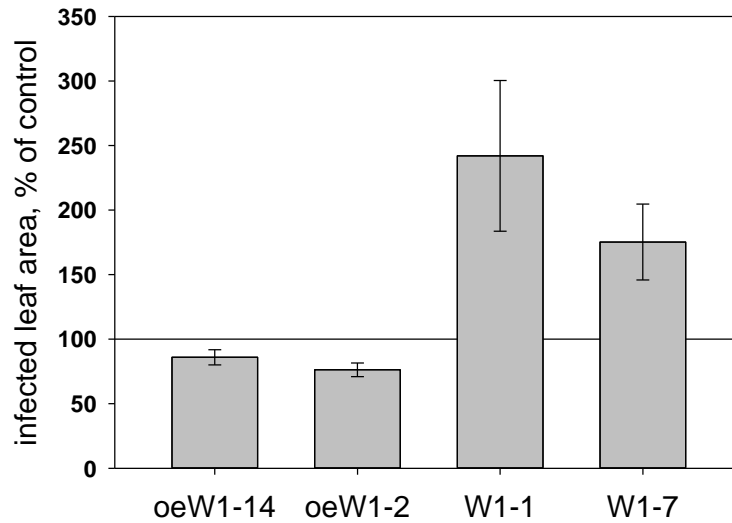

407 **Figure 11.** Infection of barley leaves by powdery mildew (*Blumeria graminis*). WT leaves were compared  
408 with leaves of two oeW1 lines over-accumulating WHIRLY1 by a factor of 50 (oeW1-14, oeW1-2), and  
409 with the *knockdown* plants having residual amounts of about 10% (W1-1) or 1% (W1-7) of WHIRLY1  
410 protein (Krupinska *et al.*, 2014b). Susceptibility was determined by the percentage of leaf area infected  
411 by the fungus. The susceptibility of the WT has been defined as 100% represented by horizontal lines.  
412

412

## 413 DISCUSSION

414 Overexpression of *WHIRLY1* in barley resulted in an up to 50-fold higher abundance of the  
415 *WHIRLY1* protein, an improved tolerance towards powdery mildew, and diminished growth,  
416 indicating a typical tradeoff between growth and defense (Herms and Mattson, 1992, Huot *et*  
417 *al.*, 2014). Although the tradeoff has often been explained by the competition of energy  
418 requirements of defense responses in relation to those for growth and reproduction, this  
419 apparently plausible explanation has also been questioned. Instead, the dilemma between  
420 development and defense was shown to stem from antagonistic crosstalks between growth  
421 and defense-related hormones (Karasov *et al.*, 2017), which can be uncoupled in mutants  
422 (Campos *et al.*, 2016).

### 423 Impact of *WHIRLY1* overexpression on growth and photosynthesis

424 For oeAt*WHIRLY1* plants, no obvious phenotype has been reported (Isemer *et al.*, 2012a). A  
425 more detailed characterization has been performed with tomato lines overexpressing  
426 *SIWHIRLY1* (Zhuang *et al.*, 2019). In these plants, the mRNA level increased dramatically by  
427 factors of about a thousand. In contrast, the protein level was only enhanced by an estimated  
428 factor of approximately five (estimated from Figure 2 in Zhuang *et al.* 2019). No significant  
429 difference was observed in the phenotypes between tomato oe*SIWHIRLY1* lines and the wild  
430 type at standard growth conditions. However, under chilling conditions, the oe*SIWHIRLY1* lines  
431 grew better than the wild-type (WT) coinciding with a reduced level of ROS, as shown by  
432 fluorescence after staining with H2DCFDA (Zhuang *et al.*, 2019). At the ultrastructural level,  
433 the oe*SIWHIRLY1* plants were shown to retain intact grana thylakoids and to accumulate less  
434 starch in chilling conditions. However, in contrast to the barley lines, overexpressing  
435 *HvWHIRLY1* (oeW1), under control conditions the abundance of starch grains did apparently  
436 not differ between WT and oe*SIWHIRLY1* plants (Zhuang *et al.*, 2019). Also in contrast to the  
437 barley oeW1 lines, the oe*SIWHIRLY1* plants showed no difference in  $F_v/F_m$  at 25°C and even

438 higher  $F_v/F_M$  values under chilling conditions (Zhuang *et al.*, 2020b). Also, in contrast to the  
439 barley oeW1 plants, RubisCO content was higher in the oeSIWHIRLY1 plants than in the WT,  
440 both at 25°C and 4°C (Zhuang *et al.*, 2020b). Under heat stress, the oeSIWHIRLY1 plants  
441 showed less wilting than WT tomato plants coinciding with increased sugar content and a  
442 reduced level of ROS (Zhuang *et al.*, 2020a).

443 In contrast to the barley oeW1 plants, the two WHIRLY1 overexpressing dicot species  
444 investigated didn't show a pronounced decrease in growth under standard conditions.  
445 Compared to the barley lines used in this study, over-accumulation of the protein in tomato is  
446 relatively low and could be a reason for the discrepancies between barley and tomato.  
447 Alternatively, the growth-related difference between WHIRLY1 over-accumulation in barley on  
448 the one hand, and tomato or Arabidopsis, on the other hand, could be due to differences in the  
449 impact of WHIRLY1 proteins on chloroplast nucleoid architecture. Only in monocots WHIRLY1  
450 proteins were shown to have a specific PRAPP motif required for the compaction of nucleoids  
451 (Oetke *et al.*, 2022). However, despite the over-accumulation of WHIRLY1, nucleoids did not  
452 show differences in their compactness and organization between WT and oeW1 plants as  
453 investigated by DNA staining (Figure 7, S3). This result is in line with the almost normal levels  
454 of plastid-encoded mRNAs (Figure S2) and the unvaried protein composition of the  
455 photosynthetic apparatus (Figure 6). Regarding these results, it is rather unlikely that  
456 alterations in the nucleoid compactness and the composition of the photosynthetic apparatus  
457 are responsible for the reduced growth of barley plants over-accumulating WHIRLY1.

458 On the other hand, the efficiencies of both photosystems, the maximal electron transport rate  
459 ( $ETR_{MAX}$ ), and the quantum yield of photosystem II ( $\Phi(II)$ ) were reduced in plants over-  
460 accumulating WHIRLY1. Inversely, the loss of absorbed energy by heat and fluorescence was  
461 enhanced in oeW1 plants indicating a malfunctioning of the photosynthetic apparatus.  
462 Potentially, changes in the hormone equilibrium could underlie the lower functionality of the  
463 photosynthetic apparatus (Muller and Munne-Bosch, 2021, Cackett *et al.*, 2022). In this regard,  
464 the barley oeW1 plants might be comparable with mutants showing constitutive defense  
465 signaling. Arabidopsis mutants with *constitutive expression of pathogenesis-related proteins*  
466 (*cpr*) showed a dwarf phenotype (Zhang *et al.*, 2003, Heidel *et al.*, 2004). To investigate  
467 whether the impaired growth is a consequence of deteriorated photosynthesis or energy-  
468 consuming defense mechanisms, Mateo *et al.*, (2006) investigated the photosynthetic  
469 properties of *cpr* mutants in comparison to the WT. Similar to the Arabidopsis *cpr* mutants,  
470 barley seedlings overexpressing WHIRLY1 have a reduced  $F_v/F_M$ , a higher ratio of VAZ pool  
471 pigments to chlorophylls, and reduced starch content as a consequence of the reduced  
472 capacity of the photosynthetic apparatus (Figure 5, 7).

### 473 **Overexpression of WHIRLY1 caused changes in the equilibrium of hormones**

474 Over-accumulation of WHIRLY1 indeed caused a shift in the hormone equilibrium. While the  
475 level of the cytokinin isopentenyl riboside (iPR) was reduced, the level of jasmonic acid (JA) is  
476 enhanced in oeW1 plants. Cytokinins are well-known for their positive impact on cell division  
477 and expansion during leaf development and growth (Brzobohaty *et al.*, 1994, Wu *et al.*, 2021).  
478 Moreover, cytokinins were shown to promote chlorophyll biosynthesis, assembly, and  
479 functioning of the photosynthetic complexes (Yaronskaya *et al.*, 2006) and to play a role in  
480 responses to stress (Albrecht and Argueso, 2017, Cortleven *et al.*, 2019). Cytokinins were  
481 found to regulate more than 100 genes involved in photosynthesis, including the genes of  
482 RubisCO and LHCs (Brenner and Schmulling, 2012) and those encoding sigma factors  
483 required for plastid gene transcription by PEP (Danilova *et al.*, 2017). Applying cytokinins to

484 wheat leaves increased endogenous cytokinin content and photosynthesis parameters  $\Phi$   
485 (PSII),  $F_v/F_m$ , and ETR, whereas inhibition of cytokinin biosynthesis had opposite effects (Yang  
486 *et al.*, 2018). The published data suggest that a decreased cytokinin level led to an inactivation  
487 of photosystem II reaction centers (Muller and Munne-Bosch, 2021). Hence, the reduced  
488 efficiencies of the photosystems, together with the decreased ETR and quantum yield of  
489 photosystem II in the oeW1 leaves, are potentially caused by the decrease in the level of iPR.  
490 Under HL, cytokinins were reported to promote D1 repair (Cortleven *et al.*, 2019). Whereas in  
491 the barley plants grown at continuous light of low irradiance, cytokinin levels were low in all  
492 genotypes, at high irradiance, the level increased in the WT but not in the oeW1 plants (Figure  
493 8).

494 Nevertheless,  $F_v/F_m$  was higher in the oeW1-14 plants in HL compared to LL. This might  
495 indicate that oeW1 plants, compared to WT plants, have a better capacity to respond to HL. A  
496 similar finding has been reported for the response of tomato plants overexpressing *WHIRLY1*  
497 towards chilling (Zhuang *et al.*, 2020b).

498 In comparison to the cytokinin level, the level of the major auxin IAA was less affected in the  
499 barley oeW1 plants. This coincided with similar expression levels of selected genes responding  
500 to auxin, i.e. *PIN1* and *TIR1* (Figure S 4). Expression of genes related to auxine biosynthesis  
501 such as the YUCCA genes was neither detectable in the WT nor in the oeW1 plants. The level  
502 of JA was enhanced in oeW1 plants under standard growth conditions (Figure 8) and during  
503 growth in continuous light of low irradiance (Figure S6). It is known that a rise in JA has a  
504 negative impact on photosynthesis (Attaran *et al.*, 2014, Muller and Munne-Bosch, 2021) and  
505 growth (Staswick *et al.*, 1992). Recently it has been shown that the treatment of barley leaves  
506 with JA affects photosynthesis at the level of the oxygen-evolving complex (Kurowska *et al.*,  
507 2020). During growth in continuous light of high irradiance, the level of JA increased in the wild  
508 type. As a consequence, the differences among the genotypes measured at low light irradiance  
509 disappeared (Figure S6).

510 In leaves collected under standard growth conditions, the higher expression of defense-related  
511 genes such as *PR1* and *HPL*, the latter of which has been proposed as general stress indicator  
512 genes (Savchenko *et al.*, 2017), indicates that over-accumulation of *WHIRLY1* activates  
513 defense signaling. Unexpectedly, the level of salicylic acids (SA) stayed below the method's  
514 lowest quantification limit, i.e. 0.1  $\mu\text{M}$ . If the over-accumulation of *WHIRLY1* would have  
515 induced its synthesis, SA would have increased above a level of 1  $\mu\text{M}$ . The SA-related  
516 compounds also did not show changes associated with *WHIRLY1* quantities. It may be  
517 supposed that SA signaling is not affected by the overexpression of *WHIRLY1* in barley. While  
518 in barley, only a limited number of pathogens induced an increase in the level of SA, all tested  
519 pathogens induced the expression of PR genes, including *PR1* (Vallelian-Bindschedler *et al.*,  
520 1998). Obviously, SA in barley is not always required for defense-related gene expression. In  
521 the barley plants grown at continuous high light, also *PR10* expression was enhanced. This  
522 gene might be expressed in response to the simultaneous presence of JA and light as reported  
523 for rice (Rakwal *et al.*, 2001, Zheng *et al.*, 2021). A minor contribution of SA to the defense  
524 response cannot be excluded considering that expression of *PAL* encoding the key enzyme of  
525 salicylic acid biosynthesis is activated in HL both in the WT and much more in the oeW1-50  
526 plants (Figure 10b).

527 In Arabidopsis, *WHIRLY1* was shown to be involved in salicylic acid (SA) signaling  
528 independent of NPR1 in the cytosol (Desveaux *et al.*, 2004, Vlot *et al.*, 2009, An and Mou,  
529 2011, Carella *et al.*, 2015). NPR1 is known to translocate from the cytosol to the nucleus upon

530 binding of salicylic acid and thioredoxin-mediated reduction (Mou *et al.*, 2003). It has been  
531 proposed that WHIRLY1 is translocated from chloroplasts to the nucleus in a similar fashion  
532 upon stress-associated redox changes in the photosynthetic apparatus (Foyer *et al.*, 2014),  
533 whereby the mechanism of translocation remains unknown (Krupinska *et al.*, 2022). In the  
534 oeW1 plants described in this study, the level of nucleus-located WHIRLY1 is highly  
535 upregulated even in the absence of stress. Consequently, in the barley oeW1 plants, defense  
536 signaling is constitutively activated, as evident by the expression of *PR1* in fully expanded  
537 leaves of seedlings grown under standard growth conditions (Figure 9) and during continuous  
538 illumination of low irradiance (Figure 10b). It is obvious that the WHIRLY1-activated defense  
539 signaling is mediated by JA rather than by SA. This result is in accordance with reports on JA-  
540 dependent defense activation involving *PR1* in rice (Yang *et al.*, 2013).

541 By the growth of the oeW1 plants at high irradiance, a dramatic increase in expression of *PR1*  
542 (450-fold instead of 70-fold in the wild type) and *PAL* (6-fold instead of only 50% in the WT)  
543 was observed (Figure 10b). This indicates that the oeW1 plants are capable of further  
544 enhancing defense responses. Considering that the abundance of WHIRLY1 is already high  
545 in non-stress conditions, it is unlikely that the higher expression of defense genes is caused  
546 by a further increase in WHIRLY1-dependent transcription of these genes. Rather WHIRLY1  
547 abundance may intensify the binding of activating factors to the promoter of *PR1* under certain  
548 conditions. Recently, it has been demonstrated that NPR1-mediated *PR1* gene expression  
549 requires the formation of an activating complex consisting of histone acetyltransferase (HAC),  
550 NPR1, and a TGA transcription factor (Jin *et al.*, 2018). Potentially, WHIRLY1 might regulate  
551 the accessibility of promoters for defense-associated transcription factors (Krupinska *et al.*,  
552 2014a, Krupinska *et al.*, 2022a).

553 Surprisingly, in barley plants overexpressing *WHIRLY1*, the gene encoding isochorismate  
554 synthase (ICS) is activated at control conditions. This high expression could be related to a  
555 demand for phyloquinone which is essential for electron transfer in photosystem I. A barley  
556 *ics* mutant was reported to be deficient in phyloquinone, whereas it was not altered in the  
557 basal level of salicylic acid (Qin *et al.*, 2019). Salicylic acid biosynthesis may proceed by two  
558 possible pathways, the ICS and *PAL* pathways, which both start from chorismate in  
559 chloroplasts (Lefevere *et al.*, 2020). In Arabidopsis, only 10% of SA is produced by the *PAL*  
560 pathway, while 90% is produced by the ICS pathway (Garcion *et al.*, 2008). By contrast in  
561 barley, *ICS* expression during HL exposure is lower than at LL (Figure 10b), while *PAL*  
562 expression is enhanced by a factor of 6. This is in accordance with the idea that in barley  
563 during stress the *PAL* pathway of SA biosynthesis is more critical than the ICS pathway. Since,  
564 in contrast to *PR1*, the expression levels of *PAL* (Figure 10) and of the defense gene *THIO1*  
565 (Figure S4) were not elevated by overexpression of WHIRLY1 under normal growth conditions,  
566 it is unlikely that these genes are directly regulated by WHIRLY1. In contrast, *PR1* and *HPL*  
567 were activated in the oeW1 plants both under normal growth conditions and at HL and,  
568 therefore might be directly activated by WHIRLY1.

569



## 570 **The role of chloroplast-nucleus located WHIRLY1 in the growth-defense tradeoff**

571 The reduced growth of oeW1 plants and the enhanced resistance towards powdery mildew  
572 indicate that overexpression of *WHIRLY1* shifts the balance between growth and resistance to  
573 the latter. In recent years hormone crosstalk has emerged as a major player in regulating the  
574 growth-defense tradeoff (Huot *et al.*, 2014). Although the antagonistic crosstalk between SA  
575 and the growth hormone auxin mostly has been reported to determine the tradeoff between  
576 growth and defense (Huot *et al.*, 2014), overexpression of *WHIRLY1* in barley had more impact  
577 on the levels of cytokinins and JA than on those of auxin and SA, suggesting that in this species  
578 the tradeoff is regulated by cytokinin and JA. However, most studies on hormonal interactions  
579 during growth and defense have been performed with *Arabidopsis*. It is likely, that hormonal  
580 interactions in monocot plants are different, as has been reported for rice (De Vleeschauwer  
581 *et al.*, 2013). It has been postulated that during immune responses in rice, NPR1-dependent  
582 SA-signaling is activated by JA binding to the COI1 receptor without a change in the level of  
583 SA (Yang *et al.*, 2013). This model is in accordance with earlier reports on barley infection by  
584 powdery mildew, in which sensitivity to powdery mildew was found to be not accompanied by  
585 accumulation of SA (Vallelian-Bindschedler *et al.*, 1998, Hückelhoven *et al.*, 1999).

586 The high accumulation of *WHIRLY1* in chloroplasts of the barley oeW1 plants had neither  
587 consequences for nucleoid organization nor plastid gene expression. Hence the reduced  
588 growth was likely not caused by changes in the plastid gene expression machinery but rather  
589 by the enhanced level of nucleus-located *WHIRLY1*, inducing changes in gene expression that  
590 eventually lead to a rewiring of hormonal homeostasis. The identical molecular weights of  
591 chloroplast-located *WHIRLY1* and nucleus-located *WHIRLY1* clearly indicate that both pools  
592 of *WHIRLY1* had been processed to the mature form inside chloroplasts. Hence *WHIRLY1*  
593 over-accumulating in the nucleus was transferred from chloroplasts to the nucleus as  
594 demonstrated before with transplastomic tobacco plants synthesizing *WHIRLY1* inside  
595 chloroplasts (Isemer *et al.*, 2012b). In another previous study, it had been shown that  
596 *Arabidopsis* plants accumulating *WHIRLY1* outside the chloroplasts behave like a *WHIRLY1*-  
597 deficient mutant (Isemer *et al.*, 2012a). Hence, the nuclear activities of *WHIRLY1* require its  
598 preceding presence in chloroplasts. Whether *WHIRLY1* undergoes a modification inside  
599 chloroplasts and how its transfer to the nucleus is mediated remains to be determined. Taken  
600 together, the findings of this study suggest that the *WHIRLY1*-mediated adjustment of  
601 hormonal homeostasis is controlled by chloroplasts which are crucial sensors of environmental  
602 information (Pfalz *et al.*, 2012, Zhang *et al.*, 2020).

603 According to the elevated *PR1* expression in the absence of stress, barley oeW1 plants  
604 showed a constitutive defense response. To avoid a negative impact on growth, the expression  
605 of resistance genes might be restricted to the time of stress perception and the subsequent  
606 defense response (Karasov *et al.*, 2017). Sequestering of *WHIRLY1* in chloroplasts is a means  
607 to avoid its nuclear activity under non-stress conditions and to allow a fast response to stress  
608 only under conditions that induce the transfer of *WHIRLY1* from chloroplasts to the nucleus  
609 (Krause and Krupinska, 2009). However, the 10 to 50 times higher level of *WHIRLY1* in the  
610 oeW1 plants obviously exceeded the capacity for *WHIRLY1* sequestration by chloroplasts. It  
611 remains to be tested whether a moderate increase in *WHIRLY1* accumulation in the chloroplast  
612 is possible without transfer to the nucleus in non-stress conditions, thereby avoiding the  
613 constitutive expression of *PR1* in the nucleus.

## 614 **EXPERIMENTAL PROCEDURES**

### 615 **Plant material and growth conditions**

616 Transgenic barley plants overexpressing *HvWHIRLY* under the control of the maize  
617 *UBIQUITIN 1* promoter were generated by the transformation of barley immature embryos by  
618 *Agrobacterium tumefaciens* as described (Hensel *et al.*, 2008). The pENTR/TOPO Gateway  
619 vector (Invitrogen, Karlsruhe, Germany) was used for the transfer to the pIPKb007 binary  
620 vector using Gateway™ LR as described (Himmelbach *et al.*, 2007). Plantlets resistant to  
621 hygromycin were transferred into soil and cultivated in a greenhouse. Additionally, PCR  
622 analyses with primers (Krupinska *et al.* 2014, Supplementary Table 1) for the hygromycin  
623 resistance cassette were performed to verify the transgene integration. As control plants, the  
624 barley cultivar “Golden Promise” and for powdery mildew assays, the *HvWHIRLY1* knockdown  
625 plants (RNAiW1-7) (Krupinska *et al.*, 2014b) were used.

626 Barley grains were sown on soil (Einheitserde ED73, Tantau, Ütersen, Germany) and  
627 transferred for three days in a dark and cold chamber (6°C) to synchronize germination.  
628 Thereafter, the grains were transferred to a climate chamber where the seedlings were grown  
629 either in a standard daily light/dark cycle (16:8) as described (Krupinska *et al.*, 2019) or in  
630 continuous light of different irradiances (100 or 350  $\mu\text{mol photons m}^{-2} \text{s}^{-1}$ ) as also described  
631 previously (Swida-Barteczka *et al.*, 2018).

### 632 **Quantum yields of the photosystems and electron transport rate**

633 The maximum quantum yield of photosystem II,  $F_v/F_m$ , and the maximum P700 ( $P_m$ ) signal  
634 were measured in parallel by Dual-PAM-100 (Walz GmbH, Effeltrich, Germany). The leaves  
635 were kept for about 10-15 minutes under low light (20-40  $\mu\text{mol m}^{-2} \text{s}^{-1}$ ) before starting the  
636 measurement. The measurement was done at 13 different light levels, starting from zero and  
637 gradually increasing during six minutes to 1600  $\mu\text{mol m}^{-2} \text{s}^{-1}$ . In between of these light levels,  
638 there was a step with 60  $\mu\text{mol m}^{-2} \text{s}^{-1}$  which is similar to the growth light in the climate chamber.  
639 The quantum yields of photosystem II as well as of non-radiative and radiative dissipation were  
640 calculated as follows (Klughammer and Schreiber, 2008):  $\Phi(\text{II}) = (F_m' - F)/F_m'$ ,  $\Phi(\text{NPQ}) =$   
641  $F/F_m' - F/F_m$ ,  $\Phi(\text{NO}) = F/F_m$ .

642

### 643 **Determination of pigments by high-performance liquid chromatography**

644 For the analysis of pigments, one cm long leaf segments excised from the area between 1.5  
645 and 3 cm below the leaf tip were immediately frozen in liquid nitrogen and kept at -80°C.  
646 Pigments were extracted and HPLC analysis was performed as described (Saeid-Nia *et al.*,  
647 2022). To calibrate the detector (Nichelmann *et al.*, 2016), pure carotenoid extracts (except  
648 antheraxanthin) were prepared through thin-layer chromatography (modified after  
649 Lichtenthaler and Pfister 1978). Afterwards, the concentrations of the pure pigment solutions  
650 were determined by spectrophotometry using the extinction coefficients provided by Davies  
651 (1976).

652

653

## 654 **Immunoblot analyses**

655 Total proteins were extracted from ground leaf material and subjected to SDS-PAGE, as  
656 reported (Krupinska *et al.*, 2014, 2019). Proteins were transferred onto the nitrocellulose  
657 membrane by semi-dry electroblotting. Antibodies against PsaA (AS06172), PsbA/D1  
658 (AS01016), LHCA1 (AS01005), and LHCB1 (AS01004) were purchased from Agrisera. The  
659 antibody directed towards HvWHIRLY1 was prepared against a synthetic peptide and can be  
660 purchased from Agrisera (AS163953). Immunoreactive complexes were visualized using a  
661 peroxidase-couples secondary antiserum with chemiluminescence detection kits (ECL Select,  
662 Amersham, USA; Lumigen, Southfield, MI, USA). The ChemiDoc MP Imaging Systems and  
663 the Image Lab 6.1 software (Bio-Rad Laboratories, Munich, Germany) were used for the  
664 quantification of signal intensities.

## 665 **Determination of hormones**

666 Leaf samples of ca. 30 mg (fresh weight) were weighed into 2 ml safe lock tubes (Eppendorf  
667 AG, Germany) and kept at -80°C until analysis. Empty tubes were used as blanks. Before  
668 extraction, two 3 mm ceria-stabilized zirconium oxide beads were placed into each tube. The  
669 samples were extracted and purified as described by Šimura *et al.* (2018) with minor  
670 modifications (Simura *et al.*, 2018). The absolute quantification of all targeted phytohormones,  
671 excluding salicylates, was performed as described (Eggert and von Wiren, 2017).

672 The analysis of salicylates was performed using UHPLC-HESI-HRMS (Vanquish UPLC)  
673 coupled to QExactive Plus Mass Spectrometer (San Jose, CA, USA). The MS was equipped  
674 with a HESI source operating in negative ion mode. Salicylates baseline separation was  
675 achieved on a reversed-phase Acquity UPLC® HSS T3 column (10 Å, 2.1 × 100mm, 1.8µm,  
676 Waters) using a gradient elution of A (Water, 0.1% FA) and B (ACN, 0.1% FA) as follows: 0–  
677 5min, 5% B; 5–10min, 5% to 80% B. Additional five minutes were added for column washing  
678 and equilibration (total run time, 15min). The column temperature was set at 45°C and the flow  
679 rate at 0.5 ml·min<sup>-1</sup>. The injection volume was 5µl. Source values were set as follows: Spray  
680 voltage 2.5kV; capillary temperature 255°C; S-lens RF level 40; Aux gas heater temp 320°C;  
681 Sheath gas flow rate 47; Aux gas flow rate 11. For spectra acquisition, a Full MS/dd-MS<sup>2</sup>  
682 experiment was performed. Resolution in Full Scan was set as 70000. For MS/MS  
683 experiments, resolution 17,500 and NCE 40V were used. The identification of compounds  
684 found in extracts was based on a comparison of their retention times, MS<sup>2</sup> spectrum and exact  
685 mass with standards.

## 686 **RNA isolation and real-time PCR analysis**

687 Total RNA was isolated from primary foliage leaves of seedlings using the peqGOLD-TriFast  
688 reagent (Peqlab Biotechnology, Erlangen, Germany) according to the manufacturer's protocol.  
689 cDNA biosynthesis and real-time PCR were performed as described previously (Krupinska *et al.*  
690 *et al.*, 2019). Data were normalized to the level of the ADP-ribosylation factor 1 mRNA (Rapacz  
691 *et al.*, 2012), to cytosolic GAPDH or to mRNA of the barley histone acetyltransferase  
692 (HORVU.MOREX.r2.1HG0027750), which has the alternative name GENERAL CONTROL  
693 NONREPRESSIBLE 5 (GCN5).

694

695 **Transmission electron microscopy**

696 Leaf segments from primary foliage leaves (2 × 2mm) at a position of 2 cm below the leaf tip  
697 were fixed and processed as described (Krupinska *et al.*, 2014b).

698 **Staining and localization of nucleoids**

699 Leaf cross-sections were produced by hand or by a hand microtome from the primary foliage  
700 leaf of plants grown for 7 days. Sections were fixed by 4% (w/v) paraformaldehyde in  
701 phosphate-buffered saline (PBS) overnight at 4°C. After washing with PBS containing 0.12  
702 %(w/v) Glycin, the sections were stained with SYBR®Green (1:5000, S7563 Invitrogen™) for  
703 45 min in darkness at room temperature. After washing with 1x PBS for 15 min, the sections  
704 were transferred onto a slide, capped with PBS/glycerol (v/v: 1:1), and a coverslip.  
705 Imaging was done at Leica SP5 confocal microscope system with an HCX PL APO CS 63.0 x  
706 1.2 W objective. Excitation was done by an argon laser line 488 (5% power). Emission was  
707 detected between 510-570 nm (HV750) and 690-760 nm (HV480). A minimum of five images  
708 out of different regions of the specimen were taken from each sample. Image analysis,  
709 coloring, and composition were done by ImageJ 1.53q.

710 **Infection with powdery mildew**

711 Five plants were grown in 12 cm pots in compost soil. In an inoculation device, transgenic lines  
712 with two pots each were arranged, with three pots containing wild type. While rotating in the  
713 inoculation tower, the fourteen-day-old seedlings were inoculated with *Blumeria graminis*  
714 spores (isolate CH4.8) until a spore density of approx. 10 spores per mm<sup>2</sup> have been reached.  
715 The disease scored 7 d after inoculation, as described (Schweizer *et al.*, 1995).  
716

717 **ACKNOWLEDGEMENTS**

718 We thank Sabine Sommerfeld (IPK Gatersleben) and Susanne Braun (Institute of Botany,  
719 CAU, Kiel) for their excellent technical assistance. We are grateful to the German Research  
720 Foundation for financial support (KR1350-19-1).

721

722

## 723 SUPPORTING INFORMATION

724 Additional Supporting Information may be found in the online version of this article:

725 **Figure S1.** (a) The abundance of WHIRLY1 in primary leaves of the lines oeW1-2 and oeW1-  
726 14. (b) Immunoblots showing the distribution of WHIRLY1 between chloroplasts and nucleus.

727 **Figure S2.** Relative levels of mRNAs of *HvWHIRLY1* and selected plastid genes (*rpoB*, *clpP*,  
728 *psaA*, *psbA*, *psbE*) were determined by RT-PCR.

729 **Figure S3.** Nucleoid morphology in different parts of primary foliage leaves from wild type,  
730 oeW1-50 and oeW1-10 plants.

731 **Figure S4.** Expression of *PIN1*, *TIR1*, *THIO1* and *GR1* in primary foliage leaves from oeW1-2  
732 and oeW1-14 grown in a daily light/dark cycle.

733 **Figure S5.** Expression of defense genes in primary foliage leaves from oeW1-2 and oeW1-14  
734 grown in continuous light of low (LL) or high irradiance (HL).

735 **Figure S6.** Hormone levels supplementing Figure 8. (a) Levels of SAG and DHBA in primary  
736 foliage leaves from oeW1-2 and oeW1-14 grown in a daily light/dark cycle, (b) levels of iRP,  
737 IAA and JA in primary foliage leaves from oeW1-2 and oeW1-14 grown in continuous light of  
738 low (LL) or high irradiance (HL).

739

## 740 REFERENCES

- 741 **Albrecht, T. and Argueso, C.T.** (2017) Should I fight or should I grow now? The role of  
742 cytokinins in plant growth and immunity and in the growth-defence trade-off. *Annals*  
743 *of Botany*, **119**, 725-735.
- 744 **An, C.F. and Mou, Z.L.** (2011) Salicylic acid and its function in plant immunity. *Journal of*  
745 *Integrative Plant Biology*, **53**, 412-428.
- 746 **Attaran, E., Major, I.T., Cruz, J.A., Rosa, B.A., Koo, A.J.K., Chen, J., Kramer, D.M., He,**  
747 **S.Y. and Howe, G.A.** (2014) Temporal dynamics of growth and photosynthesis  
748 suppression in response to jasmonate signaling. *Plant Physiology*, **165**, 1302-1314.
- 749 **Brenner, W.G. and Schmulling, T.** (2012) Transcript profiling of cytokinin action in  
750 Arabidopsis roots and shoots discovers largely similar but also organ-specific  
751 responses. *Bmc Plant Biology*, **12**.
- 752 **Brzobohaty, B., Moore, I. and Palme, K.** (1994) Cytokinin metabolism - implications for  
753 regulation of plant growth and development *Plant Molecular Biology*, **26**, 1483-1497.
- 754 **Cackett, L., Luginbuehl, L.H., Schreier, T.B., Lopez-Juez, E. and Hibberd, J.M.** (2022)  
755 Chloroplast development in green plant tissues: the interplay between light, hormone,  
756 and transcriptional regulation. *New Phytologist*, **233**, 2000-2016.
- 757 **Campos, M.L., Yoshida, Y., Major, I.T., Ferreira, D.D., Weraduwage, S.M., Froehlich,**  
758 **J.E., Johnson, B.F., Kramer, D.M., Jander, G., Sharkey, T.D. and Howe, G.A.**  
759 (2016) Rewiring of jasmonate and phytochrome B signalling uncouples plant growth-  
760 defense tradeoffs. *Nature Communications*, **7**.
- 761 **Carella, P., Wilson, D.C. and Cameron, R.K.** (2015) Some things get better with age:  
762 differences in salicylic acid accumulation and defense signaling in young and mature  
763 Arabidopsis. *Frontiers in Plant Science*, **5**.
- 764 **Cortleven, A., Leuendorf, J.E., Frank, M., Pezzetta, D., Bolt, S. and Schmulling, T.**  
765 (2019) Cytokinin action in response to abiotic and biotic stresses in plants. *Plant Cell*  
766 *and Environment*, **42**, 998-1018.



- 767 **Danilova, M.N., Kudryakova, N.V., Doroshenko, A.S., Zabrodin, D.A., Rakhmankulova,**  
768 **Z.F., Oelmuller, R. and Kusnetsov, V.V.** (2017) Opposite roles of the Arabidopsis  
769 cytokinin receptors AHK2 and AHK3 in the expression of plastid genes and genes for  
770 the plastid transcriptional machinery during senescence. *Plant Molecular Biology*, **93**,  
771 533-546.
- 772 **De Vleeschauwer, D., Gheysen, G. and Hofte, M.** (2013) Hormone defense networking in  
773 rice: tales from a different world. *Trends in Plant Science*, **18**, 555-565.
- 774 **Delker, C., Stenzel, I., Hause, B., Miersch, O., Feussner, I. and Wasternack, C.** (2006)  
775 Jasmonate biosynthesis in *Arabidopsis thaliana* - Enzymes, products, regulation.  
776 *Plant Biology*, **8**, 297-306.
- 777 **Desveaux, D., Despres, C., Joyeux, A., Subramaniam, R. and Brisson, N.** (2000) PBF-2  
778 is a novel single-stranded DNA binding factor implicated in PR-10a gene activation in  
779 potato. *Plant Cell*, **12**, 1477-1489.
- 780 **Desveaux, D., Subramaniam, R., Després, C., Mess, J.-N., Lévesque, C., Fobert, P.,**  
781 **Dangl, J. and Brisson, N.** (2004) A "Whirly" transcription factor is required for  
782 salicylic acid-dependent disease resistance in Arabidopsis. *Developmental Cell*, **6**,  
783 229-240.
- 784 **Eggert, K. and von Wiren, N.** (2017) Response of the plant hormone network to boron  
785 deficiency. *New Phytologist*, **216**, 868-881.
- 786 **Foyer, C.H., Karpinska, B. and Krupinska, K.** (2014) The functions of WHIRLY1 and  
787 REDOX-RESPONSIVE TRANSCRIPTION FACTOR 1 in cross tolerance responses  
788 in plants: a hypothesis. *Philosophical Transactions of the Royal Society B-Biological*  
789 *Sciences*, **369**.
- 790 **Garcion, C., Lohmann, A., Lamodièrre, E., Catinot, J., Buchala, A., Doermann, P. and**  
791 **Metraux, J.P.** (2008) Characterization and biological function of the  
792 ISOCHORISMATE SYNTHASE2 gene of Arabidopsis. *Plant Physiology*, **147**, 1279-  
793 1287.
- 794 **Golshani, F., Fakheri, B.A., Behshad, E. and Vashvaei, R.M.** (2015) PRs proteins and  
795 their mechanism in plants. *Biological Forum*, **7**, 477-495.
- 796 **Grabowski, E., Miao, Y., Mulisch, M. and Krupinska, K.** (2008) Single-stranded DNA  
797 binding protein Whirly1 in barley leaves is located in plastids and the nucleus of the  
798 same cell. *Plant Physiology*, **147**, 1800-1804.
- 799 **Heidel, A.J., Clarke, J.D., Antonovics, J. and Dong, X.N.** (2004) Fitness costs of mutations  
800 affecting the systemic acquired resistance pathway in *Arabidopsis thaliana*. *Genetics*,  
801 **168**, 2197-2206.
- 802 **Hensel, G., Valkov, V., Middlefell-Williams, J. and Kumlehn, J.** (2008) Efficient generation  
803 of transgenic barley: the way forward to modulate plant-microbe interactions. *Journal*  
804 *of Plant Physiology* **165**, 71-82.
- 805 **Hermis, D.A. and Mattson, W.J.** (1992) THE DILEMMA OF PLANTS - TO GROW OR  
806 DEFEND. *Quarterly Review of Biology*, **67**, 283-335.
- 807 **Himmelbach, A., Zierold, U., Hensel, G., Riechen, R., Douchkov, D., Schweizer, P. and**  
808 **Kumlehn, J.** (2007) A set of modular binary vectors for transformation of cereals.  
809 *Plant Physiology*, **145**, 1192-1200.
- 810 **Hückelhoven, R., Fodor, J., Preis, C. and Kogel, K.H.** (1999) Hypersensitive cell death  
811 and papilla formation in barley attacked by the powdery mildew fungus are associated  
812 with hydrogen peroxide but not with salicylic acid accumulation. *Plant Physiology*,  
813 **119**, 1251-1260.
- 814 **Huot, B., Yao, J., Montgomery, B.L. and He, S.Y.** (2014) Growth-Defense Tradeoffs in  
815 Plants: A Balancing Act to Optimize Fitness. *Molecular Plant*, **7**, 1267-1287.
- 816 **Isemer, R., Krause, K., Grabe, N., Kitahata, N., Asami, T. and Krupinska, K.** (2012a)  
817 Plastid located WHIRLY1 enhances the responsiveness of Arabidopsis seedlings  
818 toward abscisic acid. *Frontiers in Plant Science*, **3**.
- 819 **Isemer, R., Mulisch, M., Schäfer, A., Kirchner, S., Koop, H.U. and Krupinska, K.** (2012b)  
820 Recombinant Whirly1 translocates from transplastomic chloroplasts to the nucleus.  
821 *Febs Letters*, **586**, 85-88.

- 822 **Jin, H., Choi, S.M., Kang, M.J., Yun, S.H., Kwon, D.J., Noh, Y.S. and Noh, B.** (2018)  
823 Salicylic acid-induced transcriptional reprogramming by the HAC-NPR1-TGA histone  
824 acetyltransferase complex in Arabidopsis. *Nucleic Acids Research*, **46**, 11712-11725.
- 825 **Jwa, N.S., Agrawal, G.K., Tamogami, S., Yonekura, M., Han, O., Iwahashi, H. and**  
826 **Rakwal, R.** (2006) Role of defense/stress-related marker genes, proteins and  
827 secondary metabolites in defining rice self-defense mechanisms. *Plant Physiology*  
828 *and Biochemistry*, **44**, 261-273.
- 829 **Karasov, T.L., Chae, E., Herman, J.J. and Bergelson, J.** (2017) Mechanisms to mitigate  
830 the trade-off between growth and defense. *Plant Cell*, **29**, 666-680.
- 831 **Karpinski, S., Szechynska-Hebda, M., Wituszynska, W. and Burdiak, P.** (2013) Light  
832 acclimation, retrograde signalling, cell death and immune defences in plants. *Plant*  
833 *Cell and Environment*, **36**, 736-744.
- 834 **Klughammer, C. and Schreiber, U.** (2008) Complementary PS II quantum yields calculated  
835 from simple fluorescence parameters measured by PAM fluorometry and the  
836 saturation pulse method. *PAM Application Notes*, **1**, 27-35.
- 837 **Krause, K. and Krupinska, K.** (2009) Nuclear regulators with a second home in organelles.  
838 *Trends Plant Sci*, **14**, 194-199.
- 839 **Krupinska, K., Braun, S., Nia, M.S., Schäfer, A., Hensel, G. and Bilger, W.** (2019) The  
840 nucleoid-associated protein WHIRLY1 is required for the coordinate assembly of  
841 plastid and nucleus-encoded proteins during chloroplast development. *Planta*, **249**,  
842 1337-1347.
- 843 **Krupinska, K., Dahnhardt, D., Fischer-Kilbienski, I., Kucharewicz, W., Scharrenberg, C.,**  
844 **Trosch, M. and Buck, F.** (2014a) Identification of WHIRLY1 as a factor binding to the  
845 promoter of the stress- and senescence-associated gene *HvS40*. *Journal of Plant*  
846 *Growth Regulation*, **33**, 91-105.
- 847 **Krupinska, K., Desel, C., Frank, S. and Hensel, G.** (2022a) WHIRLIES are multifunctional  
848 DNA-binding proteins with impact on plant development and stress resistance.  
849 *Frontiers in Plant Science*, **13**.
- 850 **Krupinska, K., Desel, C., Frank, S. and Hensel, G.** (2022b) WHIRLIES are multifunctional  
851 DNA binding proteins with impact on plant development and stress resistance.  
852 *Frontiers in Plant Sciences*.
- 853 **Krupinska, K., Oetke, S., Desel, C., Mulisch, M., Schäfer, A., Hollmann, J., Kumlehn, J.**  
854 **and Hensel, G.** (2014b) WHIRLY1 is a major organizer of chloroplast nucleoids.  
855 *Frontiers in Plant Science*, **5**.
- 856 **Kucharewicz, W., Distelfeld, A., Bilger, W., Muller, M., Munne-Bosch, S., Hensel, G. and**  
857 **Krupinska, K.** (2017) Acceleration of leaf senescence is slowed down in transgenic  
858 barley plants deficient in the DNA/RNA-binding protein WHIRLY1. *Journal of*  
859 *Experimental Botany*, **68**, 983-996.
- 860 **Kurowska, M.M., Daszkowska-Golec, A., Gajecka, M., Koscielniak, P., Bierza, W. and**  
861 **Szarejko, I.** (2020) Methyl jasmonate affects photosynthesis efficiency, expression of  
862 HvTIP genes and nitrogen homeostasis in barley. *International Journal of Molecular*  
863 *Sciences*, **21**.
- 864 **Lai, C.C., Que, Q.X., Pan, R., Wang, Q., Gao, H.Y., Guan, X.F., Che, J.M. and Lai, G.T.**  
865 (2022) The single-stranded DNA-binding gene Whirly (Why1) with a strong pathogen-  
866 induced promoter from *Vitis pseudoreticulata* enhances resistance to *Phytophthora*  
867 *capsici*. *International Journal of Molecular Sciences*, **23**.
- 868 **Lefevre, H., Bauters, L. and Gheysen, G.** (2020) Salicylic acid biosynthesis in plants.  
869 *Frontiers in Plant Science*, **11**.
- 870 **Leybourne, D.J., Valentine, T.A., Binnie, K., Taylor, A., Karley, A.J. and Bos, J.I.B.**  
871 (2022) Drought stress increases the expression of barley defence genes with  
872 negative consequences for infesting cereal aphids. *Journal of Experimental Botany*,  
873 **73**, 2238-2250.
- 874 **Lichtenthaler, H.** (2013) Plastoglobuli, thylakoids, chloroplast structure and development of  
875 plastids. In *Plastid Development in Leaves during Growth and Senescence* (Biswal,  
876 B., Krupinska, K. and Biswal, U. eds). Dordrecht, Heidelberg, New York, London:  
877 Springer, pp. 337-361.

- 878 **Linthorst, H.J.M.** (1991) Pathogenesis-related proteins of plants. *Critical Reviews in Plant*  
879 *Sciences*, **10**, 123-150.
- 880 **Mateo, A., Funck, D., Mühlenbock, P., Kular, B., Mullineaux, P.M. and Karpinski, S.**  
881 (2006) Controlled levels of salicylic acid are required for optimal photosynthesis and  
882 redox homeostasis. *Journal Experimental Botany*, **57**, 1795-1807.
- 883 **Mou, Z., Fan, W.H. and Dong, X.N.** (2003) Inducers of plant systemic acquired resistance  
884 regulate NPR1 function through redox changes. *Cell*, **113**, 935-944.
- 885 **Muller, M. and Munne-Bosch, S.** (2021) Hormonal impact on photosynthesis and  
886 photoprotection in plants. *Plant Physiology*, **185**, 1500-1522.
- 887 **Nichelmann, L., Schulze, M., Herppich, W.B. and Bilger, W.** (2016) A simple indicator for  
888 non-destructive estimation of the violaxanthin cycle pigment content in leaves.  
889 *Photosynthesis Research*, **128**, 183-193.
- 890 **Oetke, S., Scheidig, A. and Krupinska, K.** (2022) WHIRLY1 of barley and maize share a  
891 PRAPP motif conferring nucleoid compaction. *Plant Cell Physiology*, **63**, 234-247.
- 892 **Park, J.E., Park, J.Y., Kim, Y.S., Staswick, P.E., Jeon, J., Yun, J., Kim, S.Y., Kim, J., Lee,**  
893 **Y.H. and Park, C.M.** (2007) GH3-mediated auxin homeostasis links growth regulation  
894 with stress adaptation response in Arabidopsis. *Journal of Biological Chemistry*, **282**,  
895 10036-10046.
- 896 **Pfalz, J., Liebers, M., Hirth, M., Grubler, B., Holtzegel, U., Schroter, Y., Dietzel, L. and**  
897 **Pfannschmidt, T.** (2012) Environmental control of plant nuclear gene expression by  
898 chloroplast redox signals. *Frontiers in Plant Science*, **3**.
- 899 **Pfalz, J., Liere, K., Kandlbinder, A., Dietz, K.-J. and Oelmüller, R.** (2006) pTAC2, -6, and -  
900 12 are components of the transcriptionally active plastid chromosome that are  
901 required for plastid gene expression. *Plant Cell*, **18**, 176-197.
- 902 **Powikrowska, M., Oetke, S., Jensen, P.E. and Krupinska, K.** (2014) Dynamic  
903 composition, shaping and organization of plastid nucleoids. *Frontiers in Plant*  
904 *Science*, **5**.
- 905 **Prikryl, J., Watkins, K.P., Friso, G., van Wijk, K.J. and Barkan, A.** (2008) A member of the  
906 Whirly family is a multifunctional RNA- and DNA-binding protein that is essential for  
907 chloroplast biogenesis. *Nucleic Acids Research*, **36**, 5152-5165.
- 908 **Qin, Y., Torp, A.M., Glauser, G., Pedersen, C., Rasmussen, S.K. and Thordal-**  
909 **Christensen, H.** (2019) Barley isochorismate synthase mutant is phyloquinone-  
910 deficient, but has normal basal salicylic acid level. *Plant Signaling & Behavior*, **14**.
- 911 **Rakwal, R., Agrawal, G.K. and Yonekura, M.** (2001) Light-dependent induction of *OsPR10*  
912 in rice (*Oryza sativa* L.) seedlings by the global stress signaling molecule jasmonic  
913 acid and protein phosphatase 2A inhibitors. *Plant Science*, **161**, 469-479.
- 914 **Rakwal, R. and Komatsu, S.** (2000) Role of jasmonate in the rice (*Oryza sativa* L.) self-  
915 defense mechanism using proteome analysis. *Electrophoresis*, **21**, 2492-2500.
- 916 **Rapacz, M., Stepien, A. and Skorupa, K.** (2012) Internal standards for quantitative RT-PCR  
917 studies of gene expression under drought treatment in barley (*Hordeum vulgare* L.):  
918 the effects of developmental stage and leaf age. *Acta Physiologiae Plantarum*, **34**,  
919 1723-1733.
- 920 **Rekhter, D., Ludke, D., Ding, Y.L., Feussner, K., Zienkiewicz, K., Lipka, V., Wiermer, M.,**  
921 **Zhang, Y.L. and Feussner, I.** (2019) Isochorismate-derived biosynthesis of the plant  
922 stress hormone salicylic acid. *Science*, **365**, 498-502.
- 923 **Saeid Nia, M., Repnik, U., Krupinska, K. and Bilger, W.** (2022) The plastid-nucleus  
924 localized DNA-binding protein WHIRLY1 is required for acclimation of barley leaves to  
925 high light. *Planta*, **255**.
- 926 **Savchenko, T., Yanykin, D., Khorobrykh, A., Terentyev, V., Klimov, V. and Dehesh, K.**  
927 (2017) The hydroperoxide lyase branch of the oxylipin pathway protects against  
928 photoinhibition of photosynthesis. *Planta*, **245**, 1179-1192.
- 929 **Schweizer, P., Vallelianbindschedler, L. and Mosinger, E.** (1995) Heat-induced resistance  
930 in barley to the powdery mildew fungus *Erysiphe graminis* f. sp. *hordei*. *Physiological*  
931 *and Molecular Plant Pathology*, **47**, 51-66.



- 932 **Simura, J., Antoniadi, I., Siroka, J., Tarkowska, D., Strnad, M., Ljung, K. and Novak, O.**  
933 (2018) Plant hormonomics: multiple phytohormone profiling by targeted  
934 metabolomics. *Plant Physiology*, **177**, 476-489.
- 935 **Staswick, P.E., Su, W.P. and Howell, S.H.** (1992) Methyl jasmonate inhibition of root  
936 growth and induction of a leaf protein are decreased in an *Arabidopsis thaliana*  
937 mutant. *Proceedings of the National Academy of Sciences of the United States of*  
938 *America*, **89**, 6837-6840.
- 939 **Su, J.B., Yang, L.Y., Zhu, Q.K., Wu, H.J., He, Y., Liu, Y.D., Xu, J., Jiang, D.A. and Zhang,**  
940 **S.Q.** (2018) Active photosynthetic inhibition mediated by MPK3/MPK6 is critical to  
941 effector-triggered immunity. *Plos Biology*, **16**.
- 942 **Swida-Barteczka, A., Krieger-Liszkay, A., Bilger, W., Voigt, U., Hensel, G.,**  
943 **Szweykowska-Kulinska, Z. and Krupinska, K.** (2018) The plastid-nucleus located  
944 DNA/RNA binding protein WHIRLY1 regulates microRNA-levels during stress in  
945 barley (*Hordeum vulgare* L.). *RNA Biology*.
- 946 **Vallelian-Bindschedler, L., Metraux, J.P. and Schweizer, P.** (1998) Salicylic acid  
947 accumulation in barley is pathogen specific but not required for defense-gene  
948 activation. *Molecular Plant-Microbe Interactions*, **11**, 702-705.
- 949 **Van Loon, L.C. and Van Strien, E.A.** (1999) The families of pathogenesis-related proteins,  
950 their activities, and comparative analysis of PR-1 type proteins. *Physiological and*  
951 *Molecular Plant Pathology*, **55**, 85-97.
- 952 **van Wijk, K.J. and Kessler, F.** (2017) Plastoglobuli: plastid microcompartments with  
953 integrated functions in metabolism, plastid developmental transitions, and  
954 environmental adaptation. In *Annual Review of Plant Biology*, Vol 68 (Merchant, S.S.  
955 ed, pp. 253-289.
- 956 **Vlot, A.C., Dempsey, D.A. and Klessig, D.F.** (2009) Salicylic acid, a multifaceted hormone  
957 to combat disease. *Annual Review of Phytopathology*, **47**, 177-206.
- 958 **Wu, W.Q., Du, K., Kang, X.Y. and Wei, H.R.** (2021) The diverse roles of cytokinins in  
959 regulating leaf development. *Horticulture Research*, **8**.
- 960 **Xiao, Y.M., Savchenko, T., Baidoo, E.E.K., Chehab, W.E., Hayden, D.M., Tolstikov, V.,**  
961 **Corwin, J.A., Kliebenstein, D.J., Keasling, J.D. and Dehesh, K.** (2012) Retrograde  
962 Signaling by the Plastidial Metabolite MEcPP Regulates Expression of Nuclear  
963 Stress-Response Genes. *Cell*, **149**, 1525-1535.
- 964 **Xiao, Y.M., Wang, J.Z. and Dehesh, K.** (2013) Review of stress specific organelles-to-  
965 nucleus metabolic signal molecules in plants. *Plant Science*, **212**, 102-107.
- 966 **Yang, D.L., Yang, Y.N. and He, Z.H.** (2013) Roles of plant hormones and their interplay in  
967 rice immunity. *Molecular Plant*, **6**, 675-685.
- 968 **Yang, D.Q., Luo, Y.L., Dong, W.H., Yin, Y.P., Li, Y. and Wang, Z.L.** (2018) Response of  
969 photosystem II performance and antioxidant enzyme activities in stay-green wheat to  
970 cytokinin. *Photosynthetica*, **56**, 567-577.
- 971 **Yaronskaya, E., Vershilovskaya, I., Poers, Y., Alawady, A.E., Averina, N. and Grimm, B.**  
972 (2006) Cytokinin effects on tetrapyrrole biosynthesis and photosynthetic activity in  
973 barley seedlings. *Planta*, **224**, 700-709.
- 974 **Zhang, Y., Zhang, A.H., Li, X.M. and Lu, C.M.** (2020) The Role of Chloroplast Gene  
975 Expression in Plant Responses to Environmental Stress. *International Journal of*  
976 *Molecular Sciences*, **21**.
- 977 **Zhang, Y.L., Goritschnig, S., Dong, X.N. and Li, X.** (2003) A gain-of-function mutation in a  
978 plant disease resistance gene leads to constitutive activation of downstream signal  
979 transduction pathways in suppressor of npr1-1, constitutive 1. *Plant Cell*, **15**, 2636-  
980 2646.
- 981 **Zheng, E.S., Wang, X.M., Xu, R.M., Yu, F.B., Zheng, C., Yang, Y., Chen, Y., Chen, J.P.,**  
982 **Yan, C.Q. and Zhou, J.** (2021) Regulation of *OsPR10a* promoter activity by  
983 phytohormone and pathogen stimulation in rice. *Rice Science*, **28**, 442-456.
- 984 **Zhuang, K.Y., Gao, Y.Y., Liu, Z.B., Diao, P.F., Sui, N., Meng, Q.W., Meng, C. and Kong,**  
985 **F.Y.** (2020a) WHIRLY1 regulates HSP21.5A expression to promote thermotolerance  
986 in tomato. *Plant and Cell Physiology*, **61**, 169-177.

- 987 **Zhuang, K.Y., Kong, F.Y., Zhang, S., Meng, C., Yang, M.M., Liu, Z.B., Wang, Y., Ma, N.N.**  
988 **and Meng, Q.W.** (2019) Whirly1 enhances tolerance to chilling stress in tomato via  
989 protection of photosystem II and regulation of starch degradation. *New Phytologist*,  
990 **221**, 1998-2012.
- 991 **Zhuang, K.Y., Wang, J.Y., Jiao, B.Z., Chen, C., Zhang, J.J., Ma, N.N. and Meng, Q.W.**  
992 (2020b) WHIRLY1 maintains leaf photosynthetic capacity in tomato by regulating the  
993 expression of RbcS1 under chilling stress. *Journal of Experimental Botany*, **71**, 3653-  
994 3663.
- 995
